# Supplementary material for: Host Genetic and Environmental Factors Shape the Composition and Function of Gut Microbiota in Populations Living at High Altitude
Source: Hindawi journal article supplement (doi:10.1155/2020/1482109), 2020-01-01

**Table S1.** Quality control of the sequence reads

| <b>Sample Id</b> | <b>Raw Reads</b> | <b>Low Quality Reads%</b> | <b>Host Reads%</b> | <b>High quality</b> |
|------------------|------------------|---------------------------|--------------------|---------------------|
| <b>3_1</b>       | 55,858,356       | 70.86%                    | 0.33%              | 16,223,028          |
| <b>3_2</b>       | 51,757,504       | 30.48%                    | 0.19%              | 35,912,596          |
| <b>3_3</b>       | 53,134,418       | 66.01%                    | 9.41%              | 16,358,646          |
| <b>3_4</b>       | 64,619,834       | 69.33%                    | 0.24%              | 18,605,339          |
| <b>3_5</b>       | 61,227,976       | 68.59%                    | 0.01%              | 19,228,180          |
| <b>3_6</b>       | 54,811,970       | 66.56%                    | 0.29%              | 18,276,164          |
| <b>3_7</b>       | 65,786,596       | 66.76%                    | 0.26%              | 21,807,526          |
| <b>3_8</b>       | 49,714,782       | 27.90%                    | 0.33%              | 35,725,452          |
| <b>3_9</b>       | 54,485,568       | 64.84%                    | 0.02%              | 19,150,586          |
| <b>3_10</b>      | 45,724,010       | 26.68%                    | 0.02%              | 33,519,184          |
| <b>3_11</b>      | 62,900,014       | 60.78%                    | 23.80%             | 18,799,058          |
| <b>3_12</b>      | 58,154,640       | 57.17%                    | 0.04%              | 24,900,122          |
| <b>3_13</b>      | 64,618,362       | 71.11%                    | 0.03%              | 18,664,044          |
| <b>3_14</b>      | 54,091,108       | 83.04%                    | 18.64%             | 7,462,566           |
| <b>3_15</b>      | 72,294,564       | 56.42%                    | 0.07%              | 31,486,562          |
| <b>S0</b>        | 46,189,622       | 13.38%                    | 3.03%              | 38,794,848          |
| <b>S1</b>        | 36,638,842       | 8.39%                     | 0.01%              | 33,561,978          |
| <b>S2</b>        | 36,263,776       | 13.22%                    | 0.03%              | 31,460,040          |
| <b>S3</b>        | 38,792,676       | 10.45%                    | 0.07%              | 34,715,240          |
| <b>S4</b>        | 38,125,376       | 11.64%                    | 0.01%              | 33,682,404          |
| <b>S5</b>        | 36,806,512       | 7.57%                     | 0.04%              | 34,007,586          |
| <b>S6</b>        | 36,862,596       | 10.25%                    | 0.10%              | 33,052,238          |
| <b>S7</b>        | 34,003,480       | 9.94%                     | 0.02%              | 30,615,974          |
| <b>S9</b>        | 33,642,370       | 13.71%                    | 0.15%              | 28,985,416          |
| <b>S11</b>       | 28,328,570       | 23.36%                    | 0.05%              | 21,699,634          |
| <b>S12</b>       | 26,114,462       | 21.55%                    | 0.01%              | 20,483,936          |
| <b>S13</b>       | 36,423,894       | 17.74%                    | 0.01%              | 29,957,042          |

Note: Sample IDs 3\_1 to 3\_15 indicate the sample numbers of native Tibetans. S0 to S13 indicate the sample numbers of Chinese Hans.

**Table S2.** Genera of gut microbiota that are significantly different between the native Tibetans and Chinese Hans

| <b>Genus</b>                          | <b>Relative abundance (%) (Tibet)</b> | <b>sd (Tibet)</b> | <b>Relative abundance (%) (Han)</b> | <b>sd (Han)</b> | <b>p-value</b> | <b>q-value</b> |
|---------------------------------------|---------------------------------------|-------------------|-------------------------------------|-----------------|----------------|----------------|
| <i>Filifactor</i>                     | 2.39E-05                              | 2.01E-05          | 1.35E-06                            | 4.69E-06        | 0.000104       | 0.000959       |
| <i>Parvimonas</i>                     | 0.000111                              | 0.000185          | 7.31E-06                            | 8.50E-06        | 0.000118       | 0.001033       |
| <i>Arcicella</i>                      | 2.34E-05                              | 2.28E-05          | 0                                   | 0               | 0.000127       | 0.001033       |
| <i>Clostridium_sensu_stricto_7</i>    | 2.21E-05                              | 2.91E-05          | 0                                   | 0               | 0.000127       | 0.001033       |
| <i>Dasania</i>                        | 1.40E-05                              | 1.17E-05          | 0                                   | 0               | 0.000127       | 0.001033       |
| <i>Ureibacillus</i>                   | 0.000201                              | 0.000269          | 0                                   | 0               | 0.000127       | 0.001033       |
| <i>Butyrivibrio</i>                   | 0.00224                               | 0.002412          | 0.00015                             | 0.000324        | 0.000128       | 0.001033       |
| <i>Marinilabiaceae_uncultured</i>     | 0.000567                              | 0.000292          | 0.000177                            | 0.000122        | 0.000128       | 0.001033       |
| <i>Algoriphagus</i>                   | 6.39E-05                              | 6.47E-05          | 1.53E-06                            | 3.59E-06        | 0.000142       | 0.001113       |
| <i>Gelria</i>                         | 5.86E-05                              | 2.87E-05          | 8.81E-06                            | 2.59E-05        | 0.000143       | 0.001113       |
| <i>Anaerosporobacter</i>              | 0.00025                               | 0.000118          | 5.90E-05                            | 6.31E-05        | 0.000156       | 0.001173       |
| <i>Tannerella</i>                     | 0.001481                              | 0.000913          | 0.000422                            | 0.000501        | 0.000156       | 0.001173       |
| <i>vadinBB60_norank</i>               | 0.001581                              | 0.001604          | 8.69E-05                            | 0.000165        | 0.000181       | 0.001334       |
| <i>Candidatus_Arthromitus</i>         | 0.000148                              | 6.24E-05          | 3.37E-05                            | 5.26E-05        | 0.000185       | 0.001334       |
| <i>Limnobacter</i>                    | 0.000131                              | 7.37E-05          | 3.17E-05                            | 2.99E-05        | 0.000189       | 0.001334       |
| <i>Syntrophococcus</i>                | 0.00084                               | 0.000465          | 0.000207                            | 0.000196        | 0.000189       | 0.001334       |
| <i>Nitrospira</i>                     | 3.23E-05                              | 2.19E-05          | 3.79E-06                            | 6.05E-06        | 0.000212       | 0.001474       |
| <i>Atopostipes</i>                    | 4.34E-05                              | 2.40E-05          | 3.64E-06                            | 5.70E-06        | 0.000233       | 0.001591       |
| <i>Arthrobacter</i>                   | 6.20E-05                              | 5.14E-05          | 1.38E-05                            | 1.33E-05        | 0.000275       | 0.001841       |
| <i>Myroides</i>                       | 0.095802                              | 0.011138          | 0.148277                            | 0.027166        | 0.000278       | 0.001841       |
| <i>Desulfovibrionaceae_uncultured</i> | 5.11E-05                              | 4.30E-05          | 6.03E-07                            | 2.09E-06        | 0.000285       | 0.001863       |
| <i>Maritimimonas</i>                  | 1.52E-05                              | 1.61E-05          | 0                                   | 0               | 0.00033        | 0.002125       |
| <i>Kurthia</i>                        | 3.53E-05                              | 2.86E-05          | 4.10E-06                            | 6.68E-06        | 0.000343       | 0.002178       |

|                                           |          |          |          |          |          |          |
|-------------------------------------------|----------|----------|----------|----------|----------|----------|
| <i>Sporomusa</i>                          | 0.000108 | 9.95E-05 | 1.66E-05 | 2.13E-05 | 0.000387 | 0.00239  |
| <i>Fusibacter</i>                         | 3.92E-05 | 4.54E-05 | 1.48E-06 | 3.47E-06 | 0.000392 | 0.00239  |
| <i>Anaerolineaceae_uncultured</i>         | 0.000209 | 0.000198 | 2.37E-05 | 2.51E-05 | 0.000404 | 0.00239  |
| <i>Prevotella</i>                         | 0.273326 | 0.155876 | 0.056298 | 0.161699 | 0.000404 | 0.00239  |
| <i>S24-7_norank</i>                       | 0.022241 | 0.039546 | 0.001709 | 0.004081 | 0.000404 | 0.00239  |
| <i>Tetrasphaera</i>                       | 0.000314 | 0.000376 | 6.59E-06 | 1.33E-05 | 0.000415 | 0.002427 |
| <i>BS11_gut_group_norank</i>              | 0.000223 | 0.000267 | 1.55E-05 | 3.54E-05 | 0.000449 | 0.002586 |
| <i>JTB255_marine_benthic_group_norank</i> | 1.92E-05 | 1.60E-05 | 3.55E-06 | 6.06E-06 | 0.000457 | 0.002601 |
| <i>RB41_norank</i>                        | 5.56E-05 | 7.07E-05 | 1.42E-06 | 3.37E-06 | 0.000477 | 0.002659 |
| <i>Coriobacteriaceae_uncultured</i>       | 0.000884 | 0.000732 | 0.000123 | 0.000123 | 0.000485 | 0.002659 |
| <i>Ruminococcaceae_uncultured</i>         | 0.072807 | 0.052484 | 0.01226  | 0.009432 | 0.000485 | 0.002659 |
| <i>Nocardioides</i>                       | 0.000117 | 0.000146 | 5.49E-06 | 9.35E-06 | 0.000501 | 0.002715 |
| <i>Flammeovirgaceae_uncultured</i>        | 1.41E-05 | 1.43E-05 | 8.08E-07 | 2.80E-06 | 0.00052  | 0.002779 |
| <i>Reichenbachiella</i>                   | 0.000148 | 0.000212 | 2.03E-06 | 5.05E-06 | 0.000578 | 0.003055 |
| <i>Aeriscardovia</i>                      | 0.000584 | 0.000985 | 7.50E-06 | 1.41E-05 | 0.000604 | 0.003153 |
| <i>Alpinimonas</i>                        | 0.000225 | 0.000143 | 3.43E-05 | 3.16E-05 | 0.000624 | 0.003189 |
| <i>Erysipelothrix</i>                     | 8.66E-05 | 6.24E-05 | 1.06E-05 | 1.48E-05 | 0.000625 | 0.003189 |
| <i>WCHB1-69_norank</i>                    | 2.60E-05 | 1.79E-05 | 6.13E-06 | 7.15E-06 | 0.000709 | 0.003576 |
| <i>Coxiella</i>                           | 1.19E-05 | 1.29E-05 | 0        | 0        | 0.000807 | 0.003786 |
| <i>Ekhidna</i>                            | 4.41E-05 | 5.18E-05 | 0        | 0        | 0.000807 | 0.003786 |
| <i>Marinicella</i>                        | 1.14E-05 | 1.03E-05 | 0        | 0        | 0.000807 | 0.003786 |
| <i>Sandaracinaceae_norank</i>             | 2.23E-05 | 2.60E-05 | 0        | 0        | 0.000807 | 0.003786 |
| <i>Sporosarcina</i>                       | 8.10E-06 | 6.67E-06 | 0        | 0        | 0.000807 | 0.003786 |
| <i>Tissierella</i>                        | 1.45E-05 | 1.58E-05 | 0        | 0        | 0.000807 | 0.003786 |
| <i>Asteroleplasma</i>                     | 0.000104 | 0.000154 | 1.42E-06 | 4.92E-06 | 0.00081  | 0.003786 |

|                                       |          |          |          |          |          |          |
|---------------------------------------|----------|----------|----------|----------|----------|----------|
| <i>Bacteroides</i>                    | 0.039279 | 0.071934 | 0.307337 | 0.174107 | 0.00083  | 0.003841 |
| <i>SM2D12_norank</i>                  | 1.77E-05 | 1.93E-05 | 1.55E-06 | 3.71E-06 | 0.000843 | 0.00386  |
| <i>Mogibacterium</i>                  | 0.000317 | 0.000347 | 1.65E-05 | 1.52E-05 | 0.00089  | 0.004033 |
| <i>Comamonas</i>                      | 5.82E-05 | 4.73E-05 | 9.96E-06 | 1.79E-05 | 0.000946 | 0.004222 |
| <i>Selenomonas</i>                    | 0.000112 | 0.000174 | 1.60E-05 | 1.96E-05 | 0.000971 | 0.004222 |
| <i>Gastranaerophilales_norank</i>     | 0.002395 | 0.00412  | 1.88E-06 | 6.53E-06 | 0.000982 | 0.004222 |
| <i>Parasutterella</i>                 | 0.000652 | 0.001997 | 0.011904 | 0.01487  | 0.000982 | 0.004222 |
| <i>Hydrogenoanaerobacterium</i>       | 0.000152 | 8.99E-05 | 5.92E-05 | 4.64E-05 | 0.000987 | 0.004222 |
| <i>Family_XIII_uncultured</i>         | 0.001578 | 0.000848 | 0.000467 | 0.00035  | 0.000989 | 0.004222 |
| <i>Subgroup_6_norank</i>              | 8.50E-05 | 8.20E-05 | 8.13E-06 | 1.18E-05 | 0.001012 | 0.004278 |
| <i>TM6_norank</i>                     | 1.43E-05 | 9.34E-06 | 2.30E-06 | 5.47E-06 | 0.001218 | 0.005068 |
| <i>Saprospiraceae_uncultured</i>      | 1.60E-05 | 1.34E-05 | 1.44E-06 | 3.39E-06 | 0.001221 | 0.005068 |
| <i>Mycoplasma</i>                     | 0.001085 | 0.000602 | 0.000416 | 0.000314 | 0.001393 | 0.005727 |
| <i>S0134_terrestrial_group_norank</i> | 8.04E-05 | 9.24E-05 | 8.36E-06 | 1.30E-05 | 0.001475 | 0.006008 |
| <i>Anaerotruncus</i>                  | 0.003244 | 0.002408 | 0.00073  | 0.001179 | 0.001648 | 0.006652 |
| <i>NB1-n_norank</i>                   | 0.000439 | 0.000875 | 6.72E-07 | 2.33E-06 | 0.001782 | 0.006903 |
| <i>Acetitomaculum</i>                 | 4.57E-05 | 3.20E-05 | 1.02E-05 | 1.61E-05 | 0.001844 | 0.006903 |
| <i>ABS-19_norank</i>                  | 5.25E-06 | 4.85E-06 | 0        | 0        | 0.001866 | 0.006903 |
| <i>Bryobacter</i>                     | 8.15E-06 | 9.50E-06 | 0        | 0        | 0.001866 | 0.006903 |
| <i>Cryomorpha</i>                     | 8.18E-06 | 8.82E-06 | 0        | 0        | 0.001866 | 0.006903 |
| <i>Desulfobulbus</i>                  | 9.12E-06 | 9.95E-06 | 0        | 0        | 0.001866 | 0.006903 |
| <i>Desulfomicrobium</i>               | 1.92E-05 | 2.11E-05 | 0        | 0        | 0.001866 | 0.006903 |
| <i>Desulfurellaceae_uncultured</i>    | 1.23E-05 | 1.32E-05 | 0        | 0        | 0.001866 | 0.006903 |
| <i>Vallitalea</i>                     | 9.37E-06 | 9.30E-06 | 0        | 0        | 0.001866 | 0.006903 |
| <i>possible_genus_04</i>              | 7.62E-06 | 7.33E-06 | 0        | 0        | 0.001866 | 0.006903 |
| <i>Leifsonia</i>                      | 0.000468 | 0.000216 | 0.000205 | 0.000135 | 0.001945 | 0.007138 |
| <i>NS11-12_marine_group_norank</i>    | 1.43E-05 | 1.23E-05 | 2.12E-06 | 5.13E-06 | 0.002074 | 0.007548 |

|                                          |          |          |          |          |          |          |
|------------------------------------------|----------|----------|----------|----------|----------|----------|
| <i>E01-9C-26_marine_group_norank</i>     | 1.35E-05 | 1.22E-05 | 6.03E-07 | 2.09E-06 | 0.002143 | 0.007737 |
| <i>Epulopiscium</i>                      | 3.58E-05 | 3.66E-05 | 8.56E-06 | 1.27E-05 | 0.002178 | 0.007798 |
| <i>Flectobacillus</i>                    | 7.33E-05 | 5.64E-05 | 2.41E-05 | 1.88E-05 | 0.002287 | 0.00806  |
| <i>Paludibacter</i>                      | 0.000309 | 0.000604 | 5.60E-05 | 0.000123 | 0.002287 | 0.00806  |
| <i>Helcococcus</i>                       | 2.52E-05 | 3.46E-05 | 9.42E-07 | 3.26E-06 | 0.002572 | 0.00896  |
| <i>Ardenticatena</i>                     | 2.44E-05 | 2.31E-05 | 2.83E-06 | 5.45E-06 | 0.002583 | 0.00896  |
| <i>RF9_norank</i>                        | 0.007521 | 0.012161 | 0.000317 | 0.000686 | 0.002688 | 0.009251 |
| <i>Propionicicella</i>                   | 4.14E-07 | 1.60E-06 | 7.11E-06 | 7.13E-06 | 0.002778 | 0.009489 |
| <i>Nitrosomonadaceae_uncultured</i>      | 4.17E-05 | 4.63E-05 | 0.000343 | 0.000398 | 0.002873 | 0.009736 |
| <i>Prochlorococcus</i>                   | 6.17E-05 | 4.08E-05 | 2.03E-06 | 4.98E-06 | 1.18E-05 | 0.000349 |
| <i>Tepidimicrobium</i>                   | 0.000124 | 7.74E-05 | 3.07E-06 | 4.60E-06 | 1.22E-05 | 0.000349 |
| <i>Caldicoprobacter</i>                  | 0.00077  | 0.000382 | 1.14E-05 | 1.04E-05 | 1.22E-05 | 0.000349 |
| <i>Marinilabiaceae_norank</i>            | 0.00028  | 0.000196 | 1.11E-05 | 7.89E-06 | 1.24E-05 | 0.000349 |
| <i>Bacillus</i>                          | 0.000445 | 0.000179 | 8.69E-05 | 4.41E-05 | 1.26E-05 | 0.000349 |
| <i>Bacteroidales_uncultured</i>          | 0.000975 | 0.000665 | 5.77E-05 | 3.06E-05 | 1.26E-05 | 0.000349 |
| <i>Cytophagaceae_uncultured</i>          | 0.00088  | 0.00042  | 0.00025  | 9.83E-05 | 1.26E-05 | 0.000349 |
| <i>OPB54_norank</i>                      | 0.000524 | 0.00022  | 3.79E-05 | 2.95E-05 | 1.26E-05 | 0.000349 |
| <i>Porphyromonas</i>                     | 0.002601 | 0.001442 | 8.95E-05 | 4.80E-05 | 1.26E-05 | 0.000349 |
| <i>RC9_gut_group</i>                     | 0.011154 | 0.010858 | 2.97E-05 | 1.58E-05 | 1.26E-05 | 0.000349 |
| <i>vadinBC27_wastewater-sludge_group</i> | 0.001884 | 0.000857 | 7.23E-05 | 4.08E-05 | 1.26E-05 | 0.000349 |
| <i>Succinivibrio</i>                     | 0.023328 | 0.038285 | 3.74E-06 | 8.51E-06 | 1.36E-05 | 0.000356 |
| <i>Marinifilum</i>                       | 0.000384 | 0.000194 | 3.67E-05 | 2.98E-05 | 1.57E-05 | 0.000361 |
| <i>Catenibacterium</i>                   | 0.009005 | 0.008361 | 1.88E-05 | 2.99E-05 | 1.77E-05 | 0.000361 |
| <i>Paucimonas</i>                        | 5.11E-05 | 2.08E-05 | 6.03E-06 | 7.51E-06 | 1.77E-05 | 0.000361 |
| <i>Olivibacter</i>                       | 0.000143 | 8.51E-05 | 9.46E-06 | 1.05E-05 | 1.85E-05 | 0.000361 |
| <i>VC2.1_Bac22_norank</i>                | 0.000113 | 5.83E-05 | 1.06E-05 | 1.33E-05 | 1.85E-05 | 0.000361 |

|                                   |          |          |          |          |          |          |
|-----------------------------------|----------|----------|----------|----------|----------|----------|
| <i>0319-6G20_norank</i>           | 7.63E-05 | 4.44E-05 | 5.53E-06 | 1.00E-05 | 1.90E-05 | 0.000361 |
| <i>Oribacterium</i>               | 0.001196 | 0.00098  | 5.74E-05 | 6.74E-05 | 1.95E-05 | 0.000361 |
| <i>Anaerococcus</i>               | 9.92E-05 | 5.19E-05 | 7.34E-07 | 2.54E-06 | 2.24E-05 | 0.000383 |
| <i>Anaerovorax</i>                | 4.73E-05 | 3.79E-05 | 7.34E-07 | 2.54E-06 | 2.24E-05 | 0.000383 |
| <i>SC-I-84_norank</i>             | 0.000103 | 9.53E-05 | 0.000547 | 0.000366 | 3.02E-05 | 0.000487 |
| <i>NS9_marine_group_norank</i>    | 7.60E-05 | 7.08E-05 | 1.41E-06 | 3.29E-06 | 3.07E-05 | 0.000487 |
| <i>Peptococcaceae_uncultured</i>  | 0.000864 | 0.000621 | 5.43E-05 | 9.31E-05 | 3.70E-05 | 0.000552 |
| <i>Fastidiosipila</i>             | 0.00017  | 0.000112 | 1.16E-05 | 1.00E-05 | 3.73E-05 | 0.000552 |
| <i>Ignatzschineria</i>            | 7.42E-05 | 3.47E-05 | 7.99E-06 | 2.30E-05 | 4.49E-05 | 0.000583 |
| <i>AEGEAN-169_marine_grou</i>     | 4.53E-05 | 3.81E-05 | 0        | 0        | 4.60E-05 | 0.000583 |
| <i>P</i>                          |          |          |          |          |          |          |
| <i>Centipeda</i>                  | 0.000118 | 0.000227 | 0        | 0        | 4.60E-05 | 0.000583 |
| <i>Cytophaga</i>                  | 2.98E-05 | 2.17E-05 | 0        | 0        | 4.60E-05 | 0.000583 |
| <i>possible_order_07_norank</i>   | 0.000177 | 0.000231 | 0        | 0        | 4.60E-05 | 0.000583 |
| <i>Acetivibrio</i>                | 6.83E-05 | 4.51E-05 | 0        | 0        | 4.85E-06 | 0.000349 |
| <i>Papillibacter</i>              | 0.002233 | 0.001367 | 0.000136 | 0.000122 | 5.68E-05 | 0.000682 |
| <i>Petrimonas</i>                 | 0.00022  | 0.000132 | 3.83E-05 | 2.93E-05 | 5.68E-05 | 0.000682 |
| <i>Chryseolinea</i>               | 0.000159 | 0.000109 | 8.08E-07 | 2.80E-06 | 6.14E-06 | 0.000349 |
| <i>Halobacillus</i>               | 7.88E-05 | 5.76E-05 | 5.99E-07 | 2.08E-06 | 6.14E-06 | 0.000349 |
| <i>SubsectionIII_FamilyI_uncu</i> | 5.27E-05 | 2.96E-05 | 4.35E-06 | 5.79E-06 | 6.23E-05 | 0.000728 |
| <i>ltured</i>                     |          |          |          |          |          |          |
| <i>Streptomyces</i>               | 0.000105 | 0.000123 | 8.49E-06 | 8.59E-06 | 6.64E-05 | 0.000755 |
| <i>BD2-2_norank</i>               | 0.000118 | 7.97E-05 | 2.50E-05 | 1.79E-05 | 6.99E-05 | 0.000775 |
| <i>Erysipelotrichaceae_norank</i> | 0.002308 | 0.00111  | 0.000331 | 0.000568 | 8.54E-05 | 0.000906 |
| <i>Prevotellaceae_uncultured</i>  | 0.016452 | 0.012108 | 0.001686 | 0.002703 | 8.57E-05 | 0.000906 |
| <i>Spirochaeta</i>                | 0.000111 | 6.52E-05 | 3.08E-06 | 5.78E-06 | 8.61E-06 | 0.000349 |
| <i>SB-1_norank</i>                | 3.92E-05 | 3.59E-05 | 2.13E-06 | 5.38E-06 | 9.03E-05 | 0.000907 |
| <i>Saccharofermentans</i>         | 4.26E-05 | 3.58E-05 | 2.18E-06 | 5.45E-06 | 9.03E-05 | 0.000907 |
| <i>Lentzea</i>                    | 1.44E-05 | 8.53E-06 | 6.70E-07 | 2.32E-06 | 9.33E-05 | 0.000907 |

|                       |          |          |          |          |          |          |
|-----------------------|----------|----------|----------|----------|----------|----------|
| <i>Intestinimonas</i> | 5.21E-05 | 4.68E-05 | 3.67E-06 | 7.12E-06 | 9.40E-05 | 0.000907 |
| <i>Slackia</i>        | 0.000411 | 0.000309 | 7.11E-06 | 1.42E-05 | 9.68E-06 | 0.000349 |
| <i>Rhodospirillum</i> | 0.000319 | 0.000213 | 2.22E-05 | 2.82E-05 | 9.98E-05 | 0.000943 |

---



**Table S3.** Bacterial genera distribution in native Tibetans and Han Chinese

| <b>Tibetan &amp; Hans</b>      | <b>Tibetians only</b>              | <b>Hans only</b>           |
|--------------------------------|------------------------------------|----------------------------|
| <i>AEGEAN-169_marine_group</i> | <i>I2up</i>                        | <i>Acanthopleuribacter</i> |
| <i>Acetanaerobacterium</i>     | <i>AKYG587</i>                     | <i>Acaryochloris</i>       |
| <i>Acetatifactor</i>           | <i>Abiotrophia</i>                 | <i>Acetobacter</i>         |
| <i>Acetitomaculum</i>          | <i>Actinoplanes</i>                | <i>Acetohalobium</i>       |
| <i>Acetivibrio</i>             | <i>Actinospica</i>                 | <i>Acidiferrobacter</i>    |
| <i>Acetobacterium</i>          | <i>Actinotalea</i>                 | <i>Acidiphilium</i>        |
| <i>Acholeplasma</i>            | <i>Aeribacillus</i>                | <i>Actimicrobium</i>       |
| <i>Achromobacter</i>           | <i>Aestuariimicrobium</i>          | <i>Actinoalloteichus</i>   |
| <i>Acidaminobacter</i>         | <i>Alishewanella</i>               | <i>Actinocorallia</i>      |
| <i>Acidaminococcus</i>         | <i>Alloiococcus</i>                | <i>Advenella</i>           |
| <i>Acidithiobacillus</i>       | <i>Alloscardovia</i>               | <i>Agaricicola</i>         |
| <i>Acidobacterium</i>          | <i>Altererythrobacter</i>          | <i>Algibacter</i>          |
| <i>Acidothermus</i>            | <i>Aminivibrio</i>                 | <i>Algicola</i>            |
| <i>Acidovorax</i>              | <i>Aminomonas</i>                  | <i>Aliidiomarina</i>       |
| <i>Acinetobacter</i>           | <i>Anaerobacillus</i>              | <i>Alkanibacter</i>        |
| <i>Actinobacillus</i>          | <i>Anaeroglobus</i>                | <i>Alkanindiges</i>        |
| <i>Actinobaculum</i>           | <i>Anaerovirgula</i>               | <i>Alterococcus</i>        |
| <i>Actinokineospora</i>        | <i>Aquabacter</i>                  | <i>Alysiella</i>           |
| <i>Actinomadura</i>            | <i>Aquamicrobium</i>               | <i>Anabaena</i>            |
| <i>Actinomyces</i>             | <i>Aureispira</i>                  | <i>Anaeromyxobacter</i>    |
| <i>Adhaeribacter</i>           | <i>Azovibrio</i>                   | <i>Ancylobacter</i>        |
| <i>Adlercreutzia</i>           | <i>Bulleidia</i>                   | <i>Anderseniella</i>       |
| <i>Aequorivita</i>             | <i>Buttiauxella</i>                | <i>Arcanobacterium</i>     |
| <i>Aeriscardovia</i>           | <i>C1-B045</i>                     | <i>Arhodomonas</i>         |
| <i>Aerococcus</i>              | <i>Caldanaerobius</i>              | <i>Azohydromonas</i>       |
| <i>Aeromicrobium</i>           | <i>Caldibacillus</i>               | <i>Azospirillum</i>        |
| <i>Aeromonas</i>               | <i>Caldicellulosiruptor</i>        | <i>BAL58_marine_group</i>  |
| <i>Afipia</i>                  | <i>Caldinitratiruptor</i>          | <i>Bacteriovorax</i>       |
| <i>Aggregatibacter</i>         | <i>Calothrix</i>                   | <i>Bartonella</i>          |
| <i>Agromyces</i>               | <i>Candidatus_Amoebophilus</i>     | <i>Bibersteinia</i>        |
| <i>Akkermansia</i>             | <i>Candidatus_Blochmannia</i>      | <i>Borrelia</i>            |
| <i>Albidiferax</i>             | <i>Candidatus_Carsonella</i>       | <i>Bowmanella</i>          |
| <i>Alcaligenes</i>             | <i>Candidatus_Hepatoplasma</i>     | <i>Brachybacterium</i>     |
| <i>Algoriphagus</i>            | <i>Candidatus_Planktoluna</i>      | <i>Brenneria</i>           |
| <i>Alicyclobacillus</i>        | <i>Candidatus_Tammella</i>         | <i>Buchnera</i>            |
| <i>Aliivibrio</i>              | <i>Cellulosimicrobium</i>          | <i>Bythopirellula</i>      |
| <i>Alistipes</i>               | <i>Cerasicoccus</i>                | <i>Caedibacter</i>         |
|                                | <i>Clostridium_sensu_stricto_1</i> |                            |
| <i>Alkalibacillus</i>          | 8                                  | <i>Caenispirillum</i>      |
| <i>Alkalibacter</i>            | <i>Conexibacter</i>                | <i>Caldisericum</i>        |
| <i>Alkaliflexus</i>            | <i>Coprothermobacter</i>           | <i>Calidifontibacter</i>   |
| <i>Alkaliphilus</i>            | <i>Coraliomargarita</i>            | <i>Caminibacter</i>        |

|                              |                          |                                         |
|------------------------------|--------------------------|-----------------------------------------|
| <i>Allisonella</i>           | <i>Craurococcus</i>      | <i>Caminicella</i>                      |
| <i>Allobaculum</i>           | <i>Crenothrix</i>        | <i>Candidatus_Allobeggiatoa</i>         |
| <i>Alloprevotella</i>        | <i>Curvibacter</i>       | <i>Candidatus_Bacilloplasma</i>         |
| <i>Alpinimonas</i>           | <i>Dehalobacterium</i>   | <i>Candidatus_Branchiomonas</i>         |
| <i>Alteromonas</i>           | <i>Demequina</i>         | <i>Candidatus_Chlorothrix</i>           |
| <i>Amycolatopsis</i>         | <i>Desulfarculus</i>     | <i>Candidatus_Flaviluna</i>             |
| <i>Anaerobiospirillum</i>    | <i>Desulfatibacillum</i> | <i>Candidatus_Glomeribacter</i>         |
| <i>Anaerobranca</i>          | <i>Dethiosulfovibrio</i> | <i>Candidatus_Gortzia</i>               |
| <i>Anaerococcus</i>          | <i>Dictyoglomus</i>      | <i>Candidatus_Hepatincola</i>           |
| <i>Anaerofilum</i>           | <i>Dietzia</i>           | <i>Candidatus_Kinetoplastibacterium</i> |
| <i>Anaerofustis</i>          | <i>Diplosphaera</i>      | <i>Candidatus_Lariskella</i>            |
| <i>Anaerophaga</i>           | <i>Dongia</i>            | <i>Candidatus_Liberibacter</i>          |
| <i>Anaeroplasma</i>          | <i>Eggerthia</i>         | <i>Candidatus_Maribeggiatoa</i>         |
| <i>Anaerosinus</i>           | <i>Elusimicrobium</i>    | <i>Candidatus_Marithioploca</i>         |
| <i>Anaerosphaera</i>         | <i>Enterovibrio</i>      | <i>Candidatus_Methylacidiphilum</i>     |
| <i>Anaerospora</i>           | <i>Fabibacter</i>        | <i>Candidatus_Moranella</i>             |
| <i>Anaerosporobacter</i>     | <i>Frigoribacterium</i>  | <i>Candidatus_Riesia</i>                |
| <i>Anaerostipes</i>          | <i>Geodermatophilus</i>  | <i>Candidatus_Scalindua</i>             |
| <i>Anaerotruncus</i>         | <i>Geopsychrobacter</i>  | <i>Candidatus_Tremblaya</i>             |
| <i>Anaerovibrio</i>          | <i>Gleocapsa</i>         | <i>Candidatus_Uzinura</i>               |
| <i>Anaerovorax</i>           | <i>Haematobacter</i>     | <i>Candidatus_Xiphinematobacter</i>     |
| <i>Aneurinibacillus</i>      | <i>Heliobacillus</i>     | <i>Candidatus_Zinderia</i>              |
| <i>Anoxybacillus</i>         | <i>Hoeflea</i>           | <i>Carboxydocella</i>                   |
| <i>Anoxynatronum</i>         | <i>Isoptericola</i>      | <i>Carboxydotherrmus</i>                |
| <i>Aquabacterium</i>         | <i>Jannaschia</i>        | <i>Castellaniella</i>                   |
| <i>Aquicella</i>             | <i>Kaistia</i>           | <i>Catenovulum</i>                      |
| <i>Aquimarina</i>            | <i>Kingella</i>          | <i>Catenulispora</i>                    |
| <i>Arcicella</i>             | <i>Kitasatospora</i>     | <i>Caulobacter</i>                      |
| <i>Arcobacter</i>            | <i>Klugiella</i>         | <i>Cedecea</i>                          |
| <i>Ardenticatena</i>         | <i>Kroppenstedtia</i>    | <i>Cellulomonas</i>                     |
| <i>Arenibacter</i>           | <i>Labrenzia</i>         | <i>Chelatococcus</i>                    |
| <i>Arenicella</i>            | <i>Lacticigenium</i>     | <i>Chlorobium</i>                       |
| <i>Arenimonas</i>            | <i>Lampropedia</i>       | <i>Chroococcus</i>                      |
| <i>Arthrobacter</i>          | <i>Lentimonas</i>        | <i>Chrysiogenes</i>                     |
| <i>Asteroleplasma</i>        | <i>Leptobacterium</i>    | <i>Chthonomonas</i>                     |
| <i>Atopobium</i>             | <i>Magnetococcus</i>     | <i>Clavibacter</i>                      |
| <i>Atopococcus</i>           | <i>Marixanthomonas</i>   | <i>Clostridiisalibacter</i>             |
| <i>Atopostipes</i>           | <i>Mesoplasma</i>        | <i>Clostridium_sensu_stricto_16</i>     |
| <i>Avibacterium</i>          | <i>Microaerobacter</i>   | <i>Clostridium_sensu_stricto_9</i>      |
| <i>Azoarcus</i>              | <i>Microvirgula</i>      | <i>Collimonas</i>                       |
| <i>Azonexus</i>              | <i>Mobiluncus</i>        | <i>Costertonia</i>                      |
| <i>Azospira</i>              | <i>Moorella</i>          | <i>Croceibacter</i>                     |
| <i>BCf9-17_termite_group</i> | <i>NS2b_marine_group</i> | <i>Crossiella</i>                       |
| <i>Bacillus</i>              | <i>NS3a_marine_group</i> | <i>Cyclobacterium</i>                   |

|                                        |                                      |                               |
|----------------------------------------|--------------------------------------|-------------------------------|
| <i>Bacteroides</i>                     | <i>Neptuniibacter</i>                | <i>Dehalobium</i>             |
| <i>Balneatrix</i>                      | <i>Neptunomonas</i>                  | <i>Delftia</i>                |
| <i>Balneola</i>                        | <i>Nesterenkonia</i>                 | <i>Derxia</i>                 |
| <i>Barnesiella</i>                     | <i>OM60(NOR5)_clade</i>              | <i>Desulfobacter</i>          |
| <i>Bauldia</i>                         | <i>Oceanisphaera</i>                 | <i>Desulfobotulus</i>         |
| <i>Bdellovibrio</i>                    | <i>Oleibacter</i>                    | <i>Desulfocella</i>           |
| <i>Bergeyella</i>                      | <i>Oligella</i>                      | <i>Desulfococcus</i>          |
| <i>Bhargavaea</i>                      | <i>Olsenella</i>                     | <i>Desulfomonile</i>          |
| <i>Bifidobacterium</i>                 | <i>Ornithobacterium</i>              | <i>Desulfonispota</i>         |
| <i>Bilophila</i>                       | <i>Oscillatoria</i>                  | <i>Desulforegula</i>          |
| <i>Bisgaardia</i>                      | <i>Ottowia</i>                       | <i>Desulforhopalus</i>        |
| <i>Blastocatella</i>                   | <i>Pelagibius</i>                    | <i>Desulfotignum</i>          |
| <i>Blastococcus</i>                    | <i>Phenylobacterium</i>              | <i>Desulfurivibrio</i>        |
| <i>Blastopirellula</i>                 | <i>Photobacterium</i>                | <i>Dichotomicrobium</i>       |
| <i>Blautia</i>                         | <i>Pilimelia</i>                     | <i>Dyadobacter</i>            |
| <i>Blvii28_wastewater-sludge_group</i> | <i>Pir4_lineage</i>                  | <i>Emticicia</i>              |
| <i>Bordetella</i>                      | <i>Plasticicumulans</i>              | <i>Enhydrobacter</i>          |
| <i>Brachymonas</i>                     | <i>Propionicyclava</i>               | <i>Ensifer</i>                |
| <i>Brachyspira</i>                     | <i>Propioniferax</i>                 | <i>Epilithonimonas</i>        |
| <i>Bradyrhizobium</i>                  | <i>Pseudaminobacter</i>              | <i>Exilispira</i>             |
| <i>Brevibacillus</i>                   | <i>Pseudoramibacter</i>              | <i>Facklamia</i>              |
| <i>Brevibacterium</i>                  | <i>Puniceicoccus</i>                 | <i>Ferrovibrio</i>            |
| <i>Brevundimonas</i>                   | <i>Rhodothalassium</i>               | <i>Filimonas</i>              |
| <i>Bryobacter</i>                      | <i>Roseobacter</i>                   | <i>Formosa</i>                |
|                                        | <i>Roseobacter_clade_NAC11-7</i>     |                               |
| <i>Burkholderia</i>                    | <i>_lineage</i>                      | <i>Francisella</i>            |
|                                        | <i>Roseobacter_clade_OCT_lineage</i> |                               |
| <i>Butyricicoccus</i>                  | <i>Rs-M59_termite_group</i>          | <i>GAL15</i>                  |
| <i>Butyricimonas</i>                   | <i>Rugamonas</i>                     | <i>GKS98_freshwater_group</i> |
| <i>Butyrivibrio</i>                    | <i>SAR92_clade</i>                   | <i>Gaiella</i>                |
| <i>CL500-29_marine_group</i>           | <i>Saccharibacter</i>                | <i>Gallionella</i>            |
| <i>Caenimonas</i>                      | <i>Salinirepens</i>                  | <i>Gangjinia</i>              |
| <i>Caldanaerobacter</i>                | <i>Sandaracinus</i>                  | <i>Geomicrobium</i>           |
| <i>Caldicoprobacter</i>                | <i>Schlesneria</i>                   | <i>Georgenia</i>              |
| <i>Caldithrix</i>                      | <i>Sharpea</i>                       | <i>Georgfuchsia</i>           |
| <i>Caloramator</i>                     | <i>Shimazuella</i>                   | <i>Gilvibacter</i>            |
| <i>Campylobacter</i>                   | <i>Silanimonas</i>                   | <i>Gracilibacillus</i>        |
| <i>Candidatus_Accumulibacter</i>       | <i>Sinomonas</i>                     | <i>Halarsenatibacter</i>      |
| <i>Candidatus_Actinomarina</i>         | <i>Skermanella</i>                   | <i>Haliscomenobacter</i>      |
| <i>Candidatus_Alysiosphaera</i>        | <i>Sneathia</i>                      | <i>Halobacteroides</i>        |
| <i>Candidatus_Aquiluna</i>             | <i>Soehngenia</i>                    | <i>Haloferula</i>             |
| <i>Candidatus_Armantifilum</i>         | <i>Sphaerotilus</i>                  | <i>Haloplasma</i>             |
| <i>Candidatus_Arthromitus</i>          | <i>Spirilliplanes</i>                | <i>Halorhodospira</i>         |
| <i>Candidatus_Cloacamonas</i>          |                                      | <i>Hansschlegelia</i>         |

|                                                    |                                          |                                      |
|----------------------------------------------------|------------------------------------------|--------------------------------------|
| <i>Candidatus_Cometibacter</i>                     | <i>Sporotomaculum</i>                    | <i>Helicobacter</i>                  |
| <i>Candidatus_Desulforudis</i>                     | <i>Streptobacillus</i>                   | <i>Herbiconiux</i>                   |
| <i>Candidatus_Entotheonella</i>                    | <i>Thalassobacillus</i>                  | <i>Hirschia</i>                      |
| <i>Candidatus_Koribacter</i>                       | <i>Thalassomonas</i>                     | <i>Holophaga</i>                     |
| <i>Candidatus_Phytoplasma</i>                      | <i>Thermanaeromonas</i>                  | <i>Hydrogenophilus</i>               |
| <i>Candidatus_Planktomarina_(DC5-80-3_lineage)</i> | <i>Thermicanus</i>                       | <i>Hyphomonas</i>                    |
| <i>Candidatus_Planktophila</i>                     | <i>Thermoanaerobacterium</i>             | <i>Ideonella</i>                     |
| <i>Candidatus_Saccharimonas</i>                    | <i>Thermodesulfatator</i>                | <i>Ignavigranum</i>                  |
| <i>Candidatus_Solibacter</i>                       | <i>Thermonema</i>                        | <i>Inhella</i>                       |
| <i>Candidatus_Sulcia</i>                           | <i>Thermosinus</i>                       | <i>Kerstesia</i>                     |
| <i>Candidatus_Symbiothrix</i>                      | <i>Thermotoga</i>                        | <i>Kineococcus</i>                   |
| <i>Candidatus_Thiophysa</i>                        | <i>Thioalkalivibrio</i>                  | <i>Kineosporia</i>                   |
| <i>Capnocytophaga</i>                              | <i>Uliginosibacterium</i>                | <i>Kordia</i>                        |
| <i>Carnobacterium</i>                              | <i>Viridibacillus</i>                    | <i>Kribbella</i>                     |
| <i>Catenibacterium</i>                             | <i>Winogradskyella</i>                   | <i>Ktedonobacter</i>                 |
| <i>Catonella</i>                                   | <i>ZD0417_marine_group</i>               | <i>Labrys</i>                        |
| <i>Cellulosilyticum</i>                            | <i>marine_group</i>                      | <i>Lactovum</i>                      |
|                                                    | <i>norank_c_Arctic97B-4_marine_group</i> |                                      |
| <i>Cellvibrio</i>                                  |                                          | <i>Larkinella</i>                    |
| <i>Centipeda</i>                                   | <i>norank_c_BD7-11</i>                   | <i>Leeia</i>                         |
| <i>Cesiribacter</i>                                | <i>norank_c_Bacilli</i>                  | <i>Leminorella</i>                   |
| <i>Cetobacterium</i>                               | <i>norank_c_DEV055</i>                   | <i>Lentibacter</i>                   |
| <i>Chamaesiphon</i>                                | <i>norank_c_Fibrobacteria</i>            | <i>Leptolinea</i>                    |
| <i>Chitinophaga</i>                                | <i>norank_c_ML635J-35</i>                | <i>Limibacter</i>                    |
| <i>Christensenella</i>                             | <i>norank_c_SHA-26</i>                   | <i>Litorilinea</i>                   |
| <i>Chromobacterium</i>                             | <i>norank_c_SS1-B-03-39</i>              | <i>Lonepinella</i>                   |
| <i>Chroococcidiopsis</i>                           | <i>norank_c_Spirochaetes</i>             | <i>Longilinea</i>                    |
| <i>Chryseobacterium</i>                            | <i>norank_f_01D2Z36</i>                  | <i>M2PB4-61_termite_group</i>        |
| <i>Chryseolinea</i>                                | <i>norank_f_A0839</i>                    | <i>M2PT2-76_termite_group</i>        |
| <i>Chryseomicrobium</i>                            | <i>norank_f_BVA18</i>                    | <i>Magnetospirillum</i>              |
| <i>Chthoniobacter</i>                              | <i>norank_f_Bacillaceae</i>              | <i>Magnetovibrio</i>                 |
| <i>Citricoccus</i>                                 | <i>norank_f_Elev-16S-1166</i>            | <i>Marine_Methylotrophic_Group_3</i> |
| <i>Citrobacter</i>                                 | <i>norank_f_Elev-16S-1332</i>            | <i>Marinococcus</i>                  |
| <i>Cloacibacillus</i>                              | <i>norank_f_F0723</i>                    | <i>Marinospirillum</i>               |
| <i>Cloacibacterium</i>                             | <i>norank_f_FCPS473</i>                  | <i>Meganema</i>                      |
| <i>Clostridium_sensu_stricto</i>                   | <i>norank_f_FFCH16767</i>                | <i>Meiothermus</i>                   |
| <i>Clostridium_sensu_stricto_1</i>                 | <i>norank_f_Family_III</i>               | <i>Mesoflavibacter</i>               |
| <i>Clostridium_sensu_stricto_10</i>                | <i>norank_f_Family_XIII</i>              | <i>Methylobacillus</i>               |
|                                                    | <i>norank_f_Flavobacteriaceae</i>        |                                      |
| <i>Clostridium_sensu_stricto_11</i>                | <i>e</i>                                 | <i>Methylobacterium</i>              |
| <i>Clostridium_sensu_stricto_12</i>                | <i>norank_f_HSB_OF53-F07</i>             | <i>Methylocaldum</i>                 |
| <i>Clostridium_sensu_stricto_13</i>                | <i>norank_f_KCM-B-112</i>                | <i>Methylococcus</i>                 |
| <i>Clostridium_sensu_stricto_14</i>                | <i>norank_f_KD1-131</i>                  | <i>Methylohalomonas</i>              |

|                                     |                                               |                           |
|-------------------------------------|-----------------------------------------------|---------------------------|
| <i>Clostridium_sensu_stricto_15</i> | <i>norank_f_KD3-93</i>                        | <i>Methylophaga</i>       |
| <i>Clostridium_sensu_stricto_17</i> | <i>norank_f_Kineosporiaceae</i>               | <i>Methylorosula</i>      |
| <i>Clostridium_sensu_stricto_3</i>  | <i>norank_f_Leptotrichiaceae</i>              | <i>Methyloversatilis</i>  |
| <i>Clostridium_sensu_stricto_5</i>  | <i>norank_f_L1142-3M24</i>                    | <i>Methylovorus</i>       |
| <i>Clostridium_sensu_stricto_7</i>  | <i>norank_f_MSB-1E8</i>                       | <i>Mitsuaria</i>          |
|                                     | <i>norank_f_Marine_Methylotrophic_Group_2</i> | <i>Mongoliicoccus</i>     |
| <i>Clostridium_sensu_stricto_8</i>  | <i>norank_f_Nitrosomonadaceae</i>             | <i>Moritella</i>          |
| <i>Coleofasciculus</i>              | <i>norank_f_OM1_clade</i>                     | <i>Mucispirillum</i>      |
| <i>Collinsella</i>                  | <i>norank_f_P_palm_C_85</i>                   | <i>Mycetocola</i>         |
| <i>Colwellia</i>                    | <i>norank_f_PeH08</i>                         | <i>NS10_marine_group</i>  |
| <i>Comamonas</i>                    | <i>norank_f_Plot4-2H12</i>                    | <i>Natronovirga</i>       |
| <i>Conchiformibius</i>              | <i>norank_f_SBYZ-1017</i>                     | <i>Nevskia</i>            |
| <i>Coprobacillus</i>                | <i>norank_f_SS1-B-06-26</i>                   | <i>Nitrolancea</i>        |
| <i>Coprobacter</i>                  | <i>norank_f_TK85</i>                          | <i>Nitrosomonas</i>       |
| <i>Coprococcus</i>                  | <i>norank_f_TTA-B15</i>                       | <i>Nitrosospira</i>       |
| <i>Coriobacterium</i>               | <i>norank_f_TX4CB-01</i>                      | <i>Nitrospina</i>         |
| <i>Corynebacterium</i>              | <i>norank_f_Xanthomonadaceae</i>              | <i>Nocardiopsis</i>       |
| <i>Coxiella</i>                     | <i>norank_f_alphaI_cluster</i>                | <i>Nonomuraea</i>         |
| <i>Crocinitomix</i>                 | <i>norank_f_mle1-27</i>                       | <i>Nostoc</i>             |
| <i>Cronobacter</i>                  | <i>norank_f_possible_family_01</i>            | <i>Novosphingobium</i>    |
| <i>Cryomorpha</i>                   | <i>norank_o_43F-1404R</i>                     | <i>Oceanobacillus</i>     |
| <i>Cryptanaerobacter</i>            | <i>norank_o_DSM_5130</i>                      | <i>Ohtaekwangia</i>       |
| <i>Cupriavidus</i>                  | <i>norank_o_Dehalococcoidales</i>             | <i>Oleiphilus</i>         |
| <i>Curtobacterium</i>               | <i>norank_o_E6aD10</i>                        | <i>Orbus</i>              |
| <i>Cyanobacterium</i>               | <i>norank_o_Ignavibacteriales</i>             | <i>Pacificibacter</i>     |
| <i>Cytophaga</i>                    | <i>norank_o_JFR0501-aaa03c07</i>              | <i>Paenalcaligenes</i>    |
| <i>Dasania</i>                      | <i>norank_o_JG30-KF-AS9</i>                   | <i>Paracoccus</i>         |
| <i>Dechloromonas</i>                | <i>norank_o_JG30-KF-CM45</i>                  | <i>Paraeggerthella</i>    |
| <i>Deferrisoma</i>                  | <i>norank_o_KM16</i>                          | <i>Paramoritella</i>      |
| <i>Defluviicoccus</i>               | <i>norank_o_Lineage_I_(Endomicrobia)</i>      | <i>Parasegetibacter</i>   |
| <i>Defluviimonas</i>                | <i>norank_o_MB11C04_marine_group</i>          | <i>Parasporobacterium</i> |
| <i>Defluviitalea</i>                | <i>norank_o_R103-B63</i>                      | <i>Parvibaculum</i>       |
| <i>Deinococcus</i>                  | <i>norank_o_RS-B22</i>                        | <i>Parvularcula</i>       |
| <i>Dendrosporobacter</i>            | <i>norank_o_Sh765B-AG-111</i>                 | <i>Patulibacter</i>       |
| <i>Denitratisoma</i>                | <i>norank_o_Subgroup_11</i>                   | <i>Pedomicrobium</i>      |
| <i>Desemzia</i>                     | <i>norank_o_Subgroup_17</i>                   | <i>Persicirhabdus</i>     |
| <i>Desulfatitalea</i>               |                                               |                           |

|                            |                                          |                                       |
|----------------------------|------------------------------------------|---------------------------------------|
| <i>Desulfitibacter</i>     | <i>norank_o__Subgroup_5</i>              | <i>Persicitalea</i>                   |
| <i>Desulfitobacterium</i>  | <i>norank_p__BHI80-139</i>               | <i>Phaeospirillum</i>                 |
| <i>Desulfobacca</i>        | <i>norank_p__CKC4</i>                    | <i>Phaselicystis</i>                  |
| <i>Desulfobulbus</i>       | <i>norank_p__GOUTA4</i>                  | <i>Phormidium</i>                     |
| <i>Desulfocapsa</i>        | <i>norank_p__RsaHF231</i>                | <i>Phycisphaera</i>                   |
| <i>Desulfomicrobium</i>    | <i>uncultured_f__Aerococceae</i>         | <i>Pigmentiphaga</i>                  |
| <i>Desulfonatronum</i>     | <i>uncultured_f__Anaplasmataceae</i>     | <i>Pirellula</i>                      |
| <i>Desulfonema</i>         | <i>uncultured_f__Clostridiaceae_3</i>    | <i>Piscinibacter</i>                  |
| <i>Desulfopila</i>         | <i>uncultured_f__Geodermatophilaceae</i> | <i>Planifilum</i>                     |
| <i>Desulfosporosinus</i>   | <i>uncultured_f__Microbacteriaceae</i>   | <i>Plantibacter</i>                   |
| <i>Desulfotomaculum</i>    | <i>uncultured_f__Pseudomonadaceae</i>    | <i>Pleurocapsa</i>                    |
| <i>Desulfovermiculus</i>   | <i>uncultured_f__Puniceicoccaeae</i>     | <i>Portibacter</i>                    |
| <i>Desulfovibrio</i>       | <i>uncultured_f__Vibrionaceae</i>        | <i>Pricia</i>                         |
| <i>Desulfurispirillum</i>  |                                          | <i>Procabacter</i>                    |
| <i>Desulfurispora</i>      |                                          | <i>Propionicimonas</i>                |
| <i>Desulfuromonas</i>      |                                          | <i>Propionimicrobium</i>              |
| <i>Desulfuromusa</i>       |                                          | <i>Propionispira</i>                  |
| <i>Dethiobacter</i>        |                                          | <i>Propionivibrio</i>                 |
| <i>Dethiosulfatibacter</i> |                                          | <i>Prosthecobacter</i>                |
| <i>Devosia</i>             |                                          | <i>Prosthecochloris</i>               |
| <i>Dialister</i>           |                                          | <i>Pseudochrobactrum</i>              |
| <i>Diaphorobacter</i>      |                                          | <i>Pseudoduganella</i>                |
| <i>Dickeya</i>             |                                          | <i>Pseudorhodofera</i>                |
| <i>Dokdonella</i>          |                                          | <i>Psychrilyobacter</i>               |
| <i>Dokdonia</i>            |                                          | <i>Psychroflexus</i>                  |
| <i>Dolosigranulum</i>      |                                          | <i>Psychroserpens</i>                 |
| <i>Dorea</i>               |                                          | <i>Pyramidobacter</i>                 |
| <i>Dysgonomonas</i>        |                                          | <i>Rapidithrix</i>                    |
| <i>Edwardsiella</i>        |                                          | <i>Rhizobacter</i>                    |
| <i>Eggerthella</i>         |                                          | <i>Rhizomicrobium</i>                 |
| <i>Ekkidna</i>             |                                          | <i>Rhodofera</i>                      |
| <i>Endozoicomonas</i>      |                                          | <i>Rhodoplanes</i>                    |
| <i>Enteractinococcus</i>   |                                          | <i>Rhodothermus</i>                   |
| <i>Enterobacter</i>        |                                          | <i>Rhodovibrio</i>                    |
| <i>Enterococcus</i>        |                                          | <i>Riemerella</i>                     |
| <i>Enterorhabdus</i>       |                                          | <i>Roseiflexus</i>                    |
| <i>Epulopiscium</i>        |                                          | <i>Roseobacter_clade_CHAB-I-5_lin</i> |

*Erwinia*  
*Erysipelothrix*  
*Erythrobacter*  
*Escherichia-Shigella*  
*Ethanoligenens*  
*Eubacterium*  
*Euhalothece*  
*Euzebya*  
*Ewingella*  
*Exiguobacterium*  
*Faecalibacterium*  
*Fastidiosipila*  
*Ferrithrix*  
*Ferritrophicum*  
*Ferruginibacter*  
*Fibrella*  
*Fibrobacter*  
*Fictibacillus*  
*Filifactor*  
*Filomicrobium*  
*Finegoldia*  
*Flavisolibacter*  
*Flavobacterium*  
*Flavonifractor*  
*Flectobacillus*  
*Flexibacter*  
*Fluviicola*  
*Fonticella*  
*Fusibacter*  
*Fusobacterium*  
*Gaetbulibacter*  
*Gallibacterium*  
*Garciella*  
*Gardnerella*  
*Gelria*  
*Gemella*  
*Gemmata*  
*Gemmatimonas*  
*Gemmobacter*  
*Geobacillus*  
*Geobacter*  
*Gilliamella*  
*Gillisia*

*eage*  
*Roseomonas*  
*Roseovarius*  
*Rubritalea*  
*Rudanella*  
*Salinicoccus*  
*Salinimicrobium*  
*Salinisphaera*  
*Saprospira*  
*Schlegelella*  
*Scytonema*  
*Sebaldella*  
*Sediminibacterium*  
*Shinella*  
*Simiduia*  
*Sinobaca*  
*Sinomicrobium*  
*Snodgrassella*  
*Snowella*  
*Sphingopyxis*  
*Sphingorhabdus*  
*Spirulina*  
*Sporolactobacillus*  
*Sterolibacterium*  
*Sulfurihydrogenibium*  
*Swaminathania*  
*Symploca*  
*Syntrophobotulus*  
*Tabrizicola*  
*Telmatobacter*  
*Telmatospirillum*  
*Tepidimonas*  
*Tepidiphilus*  
*Termite\_Treponema\_cluster*  
*Tetragenococcus*  
*Thalassobius*  
*Thermoanaerobaculum*  
*Thermobacillus*  
*Thermodesulforhabdus*  
*Thermolithobacter*  
*Thermosporothrix*  
*Thioalkalispira*  
*Thiomonas*  
*Tistlia*

*Glaciecola*  
*Globicatella*  
*Gloeocalita*  
*Gordonibacter*  
*Gracilibacter*  
*Gramella*  
*Granulicatella*  
*Granulicella*  
*Granulosicoccus*  
*Guggenheimella*  
*Haemophilus*  
*Hafnia*  
*Halanaerobium*  
*Haliangium*  
*Haliea*  
*Halobacillus*  
*Halochromatium*  
*Halolactibacillus*  
*Halomonas*  
*Halothiobacillus*  
*Helcococcus*  
*Heliobacterium*  
*Herbaspirillum*

*Herminiimonas*  
*Hespellia*  
*Holdemania*  
*Howardella*  
*Hydrogenoanaerobacterium*  
*Hydrogenophaga*  
*Hymenobacter*  
*Hyphomicrobium*  
*Iamia*  
*Idiomarina*  
*Ignatzschineria*  
*Ignavibacterium*  
*Ilumatobacter*  
*Incertae\_Sedis*  
*Inquilinus*  
*Intestinimonas*  
*Isosphaera*  
*Janthinobacterium*  
*Jeotgalibacillus*  
*Jeotgalicoccus*

*Tropicimonas*  
*Vitreoscilla*  
*Vogesella*  
*Wautersiella*  
*Weeksella*  
*Xanthobacter*  
*Xenophilus*  
*Zeaxanthinibacter*  
*Zobellia*  
*Zoogloea*  
*norank\_c\_\_ARKDMS-49*  
*norank\_c\_\_Gammaproteobacteria*  
*norank\_c\_\_JG30-KF-CM66*  
*norank\_c\_\_JG37-AG-4*  
*norank\_c\_\_KZNMV-5-B42*  
*norank\_c\_\_LD1-PB3*  
*norank\_c\_\_ML602M-17*  
*norank\_c\_\_MSB-5B2*  
*norank\_c\_\_Opitutae*  
*norank\_c\_\_Phycisphaerae*  
*norank\_c\_\_SGST604*  
*norank\_c\_\_WCHB1-32*  
*norank\_c\_\_WCHB1-41*  
*norank\_f\_\_08D2Z94\_hypersaline\_*  
*microbial\_mat\_group*  
*norank\_f\_\_09D2Z46*  
*norank\_f\_\_09D2Z48*  
*norank\_f\_\_1174-901-12*  
*norank\_f\_\_1921-2*  
*norank\_f\_\_288-2*  
*norank\_f\_\_AKIW1012*  
*norank\_f\_\_AKYH767*  
*norank\_f\_\_AT-s3-44*  
*norank\_f\_\_B01R012*  
*norank\_f\_\_B2706-C7*  
*norank\_f\_\_BPS-CK174*  
*norank\_f\_\_BSV40*  
*norank\_f\_\_BacC-u-018*  
*norank\_f\_\_CM1G08*  
*norank\_f\_\_CWT\_CU03-E12*  
*norank\_f\_\_Christensenellaceae*  
*norank\_f\_\_Cryptosporangiaceae*  
*norank\_f\_\_Cystobacteraceae*  
*norank\_f\_\_DA101\_soil\_group*



|                                |                                       |
|--------------------------------|---------------------------------------|
| <i>Johnsonella</i>             | <i>norank_f_DUNssu371</i>             |
| <i>Klebsiella</i>              | <i>norank_f_Deep_1</i>                |
| <i>Khuyvera</i>                | <i>norank_f_EF100-94H03</i>           |
| <i>Kocuria</i>                 | <i>norank_f_FamilyI</i>               |
| <i>Krasilnikovia</i>           | <i>norank_f_GOUTB8</i>                |
|                                | <i>norank_f_GoM-GC232-4463-Bac</i>    |
|                                | <i>1</i>                              |
| <i>Kurthia</i>                 | <i>norank_f_JTB215</i>                |
| <i>Lachnoanaerobaculum</i>     | <i>norank_f_KF-JG30-B3</i>            |
| <i>Lachnospira</i>             | <i>norank_f_LD12_freshwater_grou</i>  |
|                                | <i>p</i>                              |
| <i>Lacibacter</i>              | <i>norank_f_ME2</i>                   |
| <i>Lactobacillus</i>           | <i>norank_f_MWH-CFBk5</i>             |
| <i>Lactococcus</i>             | <i>norank_f_Milano-WF1B-03</i>        |
| <i>Lautropia</i>               | <i>norank_f_NS7_marine_group</i>      |
| <i>Lawsonia</i>                | <i>norank_f_Nannocystaceae</i>        |
| <i>Leadbetterella</i>          | <i>norank_f_Oligosphaeraceae</i>      |
| <i>Legionella</i>              | <i>norank_f_PAUC26f</i>               |
| <i>Leifsonia</i>               | <i>norank_f_Paenibacillaceae</i>      |
| <i>Lentibacillus</i>           | <i>norank_f_PeH15</i>                 |
| <i>Lentisphaera</i>            | <i>norank_f_Peptostreptococcaceae</i> |
| <i>Lentzea</i>                 | <i>norank_f_Porphyromonadaceae</i>    |
| <i>Leptolyngbya</i>            | <i>norank_f_Promicromonosporace</i>   |
|                                | <i>ae</i>                             |
| <i>Leptospira</i>              | <i>norank_f_R103-B20</i>              |
| <i>Leptothrix</i>              | <i>norank_f_S15A-MN91</i>             |
| <i>Leptotrichia</i>            | <i>norank_f_S25-593</i>               |
| <i>Leucobacter</i>             | <i>norank_f_SHWN-night2</i>           |
| <i>Leuconostoc</i>             | <i>norank_f_SR-FBR-L83</i>            |
| <i>Lewinella</i>               | <i>norank_f_Sva1033</i>               |
| <i>Limnobacter</i>             | <i>norank_f_Z4MB62</i>                |
| <i>Limnohabitans</i>           | <i>norank_f_cvE6</i>                  |
| <i>Listeria</i>                | <i>norank_f_gir-aah93h0</i>           |
| <i>Loktanella</i>              | <i>norank_f_s74e-6049</i>             |
| <i>Luteibacter</i>             | <i>norank_f_type_III</i>              |
| <i>Luteimonas</i>              | <i>norank_o_Armatimonadales</i>       |
| <i>Lutibacter</i>              | <i>norank_o_B1-7BS</i>                |
| <i>Lutimonas</i>               | <i>norank_o_BC-COM435</i>             |
| <i>Lutispora</i>               | <i>norank_o_Bacteroidales</i>         |
| <i>Lysinibacillus</i>          | <i>norank_o_C-2</i>                   |
| <i>Lysinimonas</i>             | <i>norank_o_Cytophagales</i>          |
| <i>Lysobacter</i>              | <i>norank_o_DTBI20</i>                |
| <i>MWH-UniP1_aquatic_group</i> | <i>norank_o_FW113</i>                 |
| <i>Macelibacteroides</i>       | <i>norank_o_GIF9</i>                  |
| <i>Macrococcus</i>             |                                       |

|                        |                                        |
|------------------------|----------------------------------------|
| <i>Mahella</i>         | <i>norank_o_GZKB75</i>                 |
| <i>Mangroviflexus</i>  | <i>norank_o_Halanaerobiales</i>        |
| <i>Mannheimia</i>      | <i>norank_o_KD3-62</i>                 |
| <i>Maribacter</i>      | <i>norank_o_Lineage_IIc</i>            |
| <i>Marinicella</i>     | <i>norank_o_ML-A-10</i>                |
| <i>Marinifilum</i>     | <i>norank_o_MSBL5</i>                  |
| <i>Mariniradius</i>    | <i>norank_o_NRB23</i>                  |
| <i>Marinobacter</i>    | <i>norank_o_SAR11_clade</i>            |
| <i>Marinobacterium</i> | <i>norank_o_SSI-B-09-64</i>            |
| <i>Marinoscillum</i>   | <i>norank_o_Solirubrobacterales</i>    |
| <i>Mariprofundus</i>   | <i>norank_o_Subgroup_9</i>             |
| <i>Maritimibacter</i>  | <i>norank_o_TPD-58</i>                 |
| <i>Maritimimonas</i>   | <i>norank_o_WD2101_soil_group</i>      |
| <i>Marmoricola</i>     | <i>norank_o_d142</i>                   |
| <i>Marvinbryantia</i>  | <i>norank_p_Candidate_division_O</i>   |
| <i>Massilia</i>        | <i>P9</i>                              |
| <i>Megamonas</i>       | <i>norank_p_GAL08</i>                  |
| <i>Megasphaera</i>     | <i>norank_p_Hyd24-12</i>               |
| <i>Melioribacter</i>   | <i>norank_p_aquifer1</i>               |
| <i>Meniscus</i>        | <i>possible_genus_05</i>               |
| <i>Mesorhizobium</i>   | <i>pt46</i>                            |
| <i>Methylibium</i>     | <i>uncultured_f_Acetobacteraceae</i>   |
| <i>Methylophilus</i>   | <i>uncultured_f_Chlamydiaceae</i>      |
| <i>Methylotenera</i>   | <i>uncultured_f_Deferribacteraceae</i> |
|                        | <i>uncultured_f_Gracilibacteraceae</i> |
|                        | <i>uncultured_f_Halobacteroidacea</i>  |
|                        | <i>e</i>                               |
| <i>Microbacterium</i>  | <i>uncultured_f_Legionellaceae</i>     |
| <i>Micrococcus</i>     | <i>uncultured_f_Micrococcaceae</i>     |
| <i>Microcystis</i>     | <i>uncultured_f_Moraxellaceae</i>      |
| <i>Microlunatus</i>    | <i>uncultured_f_Rickettsiaceae</i>     |
| <i>Micromonospora</i>  | <i>uncultured_f_Simkaniaceae</i>       |
| <i>Microvirga</i>      | <i>uncultured_f_Sphingomonadacea</i>   |
|                        | <i>e</i>                               |
| <i>Mitsuokella</i>     | <i>uncultured_f_Sporichthyaceae</i>    |
| <i>Modestobacter</i>   | <i>uncultured_f_Thermoactinomycet</i>  |
|                        | <i>aceae</i>                           |
| <i>Mogibacterium</i>   | <i>uncultured_o_Bacillales</i>         |
| <i>Moraxella</i>       | <i>uncultured_o_Chloroflexales</i>     |
| <i>Morganella</i>      | <i>uncultured_o_Rhizobiales</i>        |
| <i>Moryella</i>        | <i>uncultured_o_Rickettsiales</i>      |
| <i>Mucilagibacter</i>  | <i>uncultured_o_Sphingomonadales</i>   |
| <i>Murdochiella</i>    |                                        |
| <i>Muricauda</i>       |                                        |
| <i>Mycobacterium</i>   |                                        |

*Mycoplasma*  
*Myroides*  
*NS4\_marine\_group*  
*NS5\_marine\_group*  
*Nafulsella*  
*Nannocystis*  
*Negativicoccus*  
*Neisseria*  
*Niabella*  
*Nitratifractor*  
*Nitratireductor*  
*Nitriliruptor*  
*Nitritalea*  
*Nitrobacter*  
*Nitrosococcus*  
*Nitrospira*  
*Nocardia*  
*Nocardioides*  
*Nonlabens*  
*Nordella*  
*Nosocomiicoccus*  
*Noviherbaspirillum*  
*OM27\_clade*  
*OM43\_clade*  
*Oceanicaulis*  
*Ochrobactrum*  
*Odoribacter*  
*Oligosphaera*  
*Olivibacter*  
*Opitutus*  
*Oribacterium*  
*Ornatilinea*  
*Oryzihumus*  
*Oscillibacter*  
*Oscillospira*  
*Otariodibacter*  
*Owenweeksia*  
*Oxalobacter*  
*Oxobacter*  
*PRD01a011B*  
*Paenibacillus*  
*Paludibacter*  
*Pantoea*  
*Papillibacter*

*Parabacteroides*  
*Parapedobacter*  
*Paraprevotella*  
*Parasutterella*  
*Parvibacter*  
*Parvimonas*  
*Pasteurella*  
*Paucimonas*  
*Paucisalibacillus*  
*Pectinatus*  
*Pectobacterium*  
*Pediococcus*  
*Pedobacter*  
*Pelobacter*  
*Pelomonas*  
*Pelosinus*  
*Pelospira*  
*Pelotomaculum*  
*Peptococcus*  
*Peptoniphilus*  
*Peptostreptococcus*  
*Peredibacter*  
*Petrimonas*  
*Phascolarctobacterium*  
*Phocaeicola*  
*Phocoenobacter*  
*Phycoccus*  
*Phyllobacterium*  
*Planctomyces*  
*Planococcus*  
*Planomicrobium*  
*Plesiomonas*  
*Polaribacter*  
*Polaromonas*  
*Polynucleobacter*  
*Pontibacillus*  
*Pontibacter*  
*Porphyromonas*  
*Prevotella*  
*Prochlorococcus*  
*Prochlorothrix*  
*Prolixibacter*  
*Promicromonospora*  
*Propionibacterium*

*Propionicicella*  
*Propionispora*  
*Proteiniborus*  
*Proteiniclasticum*  
*Proteiniphilum*  
*Proteocatella*  
*Proteus*  
*Providencia*  
*Pseudoalteromonas*  
*Pseudobutyrvibrio*  
*Pseudoclavibacter*  
*Pseudoflavonifractor*  
*Pseudofulvimonas*  
*Pseudolabrys*  
*Pseudomonas*  
*Pseudonocardia*  
*Pseudospirillum*  
*Pseudoxanthomonas*  
*Psychrobacter*  
*Psychromonas*  
*Pusillimonas*  
*Quadrisphaera*  
*Quinella*  
*RC9\_gut\_group*  
*Rahnella*  
*Ralstonia*  
*Ramlibacter*  
*Raoultella*  
*Reichenbachiella*  
*Reyranella*  
*Rheinheimera*  
*Rhizobium*  
*Rhodanobacter*  
*Rhodobacter*  
*Rhodobium*  
*Rhodococcus*  
*Rhodocytophaga*  
*Rhodoglobus*  
*Rhodopirellula*  
*Rhodopseudomonas*  
*Rhodospirillum*  
*Rhodovulum*  
*Rickettsia*  
*Rikenella*

*Robinsoniella*  
*Roseateles*  
*Roseburia*  
*Roseibacillus*  
*Rothia*  
*Rubellimicrobium*  
*Rubrobacter*  
*Ruegeria*  
*Ruminobacter*  
*Ruminococcus*  
*SEEP-SRB1*  
*SEEP-SRB4*  
*SM1A02*  
*SP3-e08*  
*Saccharofermentans*  
*Saccharopolyspora*  
*Salegentibacter*  
*Salinibacter*  
*Salmonella*  
*Sarcina*  
*Scardovia*  
*Schleiferia*  
*Sedimentibacter*  
*Sediminibacter*  
*Sediminimonas*  
*Segetibacter*  
*Selenomonas*  
*Serratia*  
*Shewanella*  
*Shimwellia*  
*Shuttleworthia*  
*Sideroxydans*  
*Simplicispira*  
*Singulisphaera*  
*Siphonobacter*  
*Slackia*  
*Smithella*  
*Sodalis*  
*Solibacillus*  
*Solirubrobacter*  
*Solitalea*  
*Solobacterium*  
*Sorangium*  
*Sphingobacterium*

*Sphingobium*  
*Sphingomonas*  
*Sphingosinicella*  
*Spirochaeta*  
*Spiroplasma*  
*Spirosoma*  
*Sporobacter*  
*Sporomusa*  
*Sporosarcina*  
*Staphylococcus*  
*Stenotrophomonas*  
*Steroidobacter*  
*Stomatobaculum*  
*Streptococcus*  
*Streptomyces*  
*Subdoligranulum*  
*Succinatimonas*  
*Succiniclasticum*  
*Succinimonas*  
*Succinispira*  
*Succinivibrio*  
*Sufflavibacter*  
*Sulfitobacter*  
*Sulfobacillus*  
*Sulfuricella*  
*Sulfuricurvum*  
*Sulfurimonas*  
*Sulfuritalea*  
*Sulfurospirillum*  
*Sulfurovum*  
*Sunxiuqinia*  
*Sutterella*  
*Sva0081\_sediment\_group*  
*Symbiobacterium*  
*Synechococcus*  
*Synechocystis*  
*Syntrophococcus*  
*Syntrophomonas*  
*Syntrophorhabdus*  
*Syntrophus*  
*Tannerella*  
*Tatumella*  
*Tenacibaculum*  
*Tepidimicrobium*

*Terrimonas*  
*Tessaracoccus*  
*Tetrasphaera*  
*Thalassospira*  
*Thauera*  
*Thermacetogenium*  
*Thermanaerovibrio*  
*Thermincola*  
*Thermobifida*  
*Thermomonas*  
*Thermovirga*  
*Thiobacillus*  
*Thiohalocapsa*  
*Thiohalorhabdus*  
*Thiomicrospira*  
*Thiothrix*  
*Tissierella*  
*Tolumonas*  
*Treponema*  
*Trichococcus*  
*Tropicibacter*  
*Truepera*  
*Tumebacillus*  
*Tunicatimonas*  
*Turicibacter*  
*Turneriella*  
*U29-B03*  
*Ulvibacter*  
*Undibacterium*  
*Ureaplasma*  
*Ureibacillus*  
*Vagococcus*  
*Vallitalea*  
*Varibaculum*  
*Variovorax*  
*Veillonella*  
*Verrucomicrobium*  
*Vibrio*  
*Victivallis*  
*Virgibacillus*  
*Weissella*  
*Xanthomonas*  
*Xenorhabdus*  
*Yersinia*



*Zymomonas*  
*dgA-11\_gut\_group*  
*endosymbionts*  
*hgcl\_clade*  
*hoa5-07d05\_gut\_group*  
*norank\_c\_\_055B07-P-DI-P58*  
*norank\_c\_\_AEGEAN-245*  
*norank\_c\_\_Acidobacteria*  
*norank\_c\_\_Actinobacteria*  
*norank\_c\_\_BD2-2*  
*norank\_c\_\_BSV13*  
*norank\_c\_\_Cyanobacteria*  
*norank\_c\_\_Gitt-GS-136*  
*norank\_c\_\_OM190*  
*norank\_c\_\_OPB35\_soil\_group*  
*norank\_c\_\_OPB54*  
*norank\_c\_\_Oligosphaeria*  
*norank\_c\_\_Pla3\_lineage*  
*norank\_c\_\_Pla4\_lineage*  
*norank\_c\_\_R76-B128*  
*norank\_c\_\_RFP12\_gut\_group*  
*norank\_c\_\_S085*  
*norank\_c\_\_SAR202\_clade*  
*norank\_c\_\_SB-1*  
*norank\_c\_\_SB-5*  
*norank\_c\_\_SC3-20*  
*norank\_c\_\_SMIA07*  
*norank\_c\_\_TA18*  
*norank\_c\_\_TK10*  
*norank\_c\_\_VC2.1\_Bac22*  
*norank\_c\_\_vadinHA17*  
*norank\_c\_\_vadinHA49*  
*norank\_f\_\_0319-6G20*  
*norank\_f\_\_0319-6M6*  
*norank\_f\_\_21f08*  
*norank\_f\_\_480-2*  
*norank\_f\_\_64K2*  
*norank\_f\_\_9M32*  
*norank\_f\_\_ABS-19*  
*norank\_f\_\_Actinomycetaceae*  
*norank\_f\_\_Alcanivoracaceae*  
*norank\_f\_\_BS11\_gut\_group*  
*norank\_f\_\_BSV26*  
*norank\_f\_\_CA002*

*norank\_f\_\_CAP-aah99b04*  
*norank\_f\_\_CFT112H7*  
*norank\_f\_\_CMW-169*  
*norank\_f\_\_CR-115*  
*norank\_f\_\_Chlorobiaceae*  
*norank\_f\_\_Comamonadaceae*  
*norank\_f\_\_Coriobacteriaceae*  
*norank\_f\_\_DA111*  
*norank\_f\_\_DEV007*  
*norank\_f\_\_DUNssu044*  
*norank\_f\_\_Defluviitaleaceae*  
*norank\_f\_\_E6aC02*  
*norank\_f\_\_Enterobacteriaceae*  
*norank\_f\_\_Erysipelotrichaceae*  
*norank\_f\_\_FTLpost3*  
*norank\_f\_\_GR-WP33-58*  
*norank\_f\_\_Hados.Sed.Eubac.3*  
*norank\_f\_\_Hyphomonadaceae*  
*norank\_f\_\_I-10*  
*norank\_f\_\_IheB3-7*  
*norank\_f\_\_JTB255\_marine\_benthi*  
*c\_group*  
*norank\_f\_\_LCP-89*  
*norank\_f\_\_LD29*  
*norank\_f\_\_LH041*  
*norank\_f\_\_LWSR-14*  
*norank\_f\_\_Lachnospiraceae*  
*norank\_f\_\_LI142-1A4*  
*norank\_f\_\_M2PB4-65\_termite\_gro*  
*up*  
*norank\_f\_\_MA-28-I98C*  
*norank\_f\_\_MAT-CR-H4-C10*  
*norank\_f\_\_MAT-CR-H6-H10*  
*norank\_f\_\_MAT-CR-P4-C12*  
*norank\_f\_\_MBAE14*  
*norank\_f\_\_ML635J-40\_aquatic\_gr*  
*oup*  
*norank\_f\_\_Marinilabiaceae*  
*norank\_f\_\_Methylophilaceae*  
*norank\_f\_\_MgMjR-022*  
*norank\_f\_\_NS11-12\_marine\_grou*  
*p*  
*norank\_f\_\_NS9\_marine\_group*  
*norank\_f\_\_OM182\_clade*

*norank\_f\_\_OPB56*  
*norank\_f\_\_Oxalobacteraceae*  
*norank\_f\_\_P.\_palm\_C-A\_51*  
*norank\_f\_\_P5D1-392*  
*norank\_f\_\_PAUC43f\_marine\_bent*  
*hic\_group*  
*norank\_f\_\_PHOS-HE36*  
*norank\_f\_\_PHOS-HE51*  
*norank\_f\_\_PL-11B10*  
*norank\_f\_\_PL-11B8\_wastewater-sl*  
*udge\_group*  
*norank\_f\_\_Pasteurellaceae*  
*norank\_f\_\_Prevotellaceae*  
*norank\_f\_\_RB41*  
*norank\_f\_\_RF16*  
*norank\_f\_\_RH-aaj90h05*  
*norank\_f\_\_Rhodocyclaceae*  
*norank\_f\_\_Rs-E47\_termite\_group*  
*norank\_f\_\_Ruminococcaceae*  
*norank\_f\_\_S0134\_terrestrial\_grou*  
*p*  
*norank\_f\_\_S24-7*  
*norank\_f\_\_SAR116\_clade*  
*norank\_f\_\_SAR406\_clade(Marine\_*  
*group\_A)*  
*norank\_f\_\_SAR86\_clade*  
*norank\_f\_\_SBYC*  
*norank\_f\_\_SJA-149*  
*norank\_f\_\_SM2D12*  
*norank\_f\_\_SRB2*  
*norank\_f\_\_ST-12K33*  
*norank\_f\_\_Sandaracinaceae*  
*norank\_f\_\_Sphingobacteriaceae*  
*norank\_f\_\_Sporichthyaceae*  
*norank\_f\_\_Surface\_1*  
*norank\_f\_\_Surface\_2*  
*norank\_f\_\_Surface\_4*  
*norank\_f\_\_Sva0725*  
*norank\_f\_\_Sva0996\_marine\_group*  
*norank\_f\_\_TSAC18*  
*norank\_f\_\_Veillonellaceae*  
*norank\_f\_\_WCHB1-69*  
*norank\_f\_\_ZD0405*  
*norank\_f\_\_boneC3G7*

*norank\_f\_\_env.OPS\_17*  
*norank\_f\_\_livecontrolB21*  
*norank\_f\_\_mitochondria*  
*norank\_f\_\_p-2534-18B5\_gut\_grou*  
*p*  
*norank\_f\_\_possible\_family\_02*  
*norank\_f\_\_ratAN060301C*  
*norank\_f\_\_vadinBB60*  
*norank\_o\_\_34P16*  
*norank\_o\_\_AK4AB2-03B*  
*norank\_o\_\_AKIW781*  
*norank\_o\_\_AT425-EubC11\_terrest*  
*rial\_group*  
*norank\_o\_\_Adriatic90*  
*norank\_o\_\_Ardenticatenales*  
*norank\_o\_\_B38*  
*norank\_o\_\_BD2-11\_terrestrial\_gr*  
*oup*  
*norank\_o\_\_BD7-8\_marine\_group*  
*norank\_o\_\_BD72BR169*  
*norank\_o\_\_C0119*  
*norank\_o\_\_CCM11a*  
*norank\_o\_\_Caenarcaniphilales*  
*norank\_o\_\_Chthonomonadales*  
*norank\_o\_\_D8A-2*  
*norank\_o\_\_DB1-14*  
*norank\_o\_\_E01-9C-26\_marine\_gr*  
*oup*  
*norank\_o\_\_EC3*  
*norank\_o\_\_FGL12-B44*  
*norank\_o\_\_GR-WP33-30*  
*norank\_o\_\_Gastranaerophilales*  
*norank\_o\_\_HOC36*  
*norank\_o\_\_KI89A\_clade*  
*norank\_o\_\_Kazan-3B-09*  
*norank\_o\_\_Lineage\_Ia*  
*norank\_o\_\_Lineage\_Iib*  
*norank\_o\_\_Lineage\_IV*  
*norank\_o\_\_NBI-n*  
*norank\_o\_\_NKB5*  
*norank\_o\_\_OCS116\_clade*  
*norank\_o\_\_Obscuribacterales*  
*norank\_o\_\_Oligosphaerales*  
*norank\_o\_\_P131-4*

*norank\_o\_PeM15*  
*norank\_o\_Pla1\_lineage*  
*norank\_o\_RF9*  
*norank\_o\_RS-F29*  
*norank\_o\_Run-SP154*  
*norank\_o\_SAR324\_clade(Marine*  
*\_group\_B)*  
*norank\_o\_SB1-18*  
*norank\_o\_SC-I-84*  
*norank\_o\_Sh765B-TzT-29*  
*norank\_o\_Subgroup\_18*  
*norank\_o\_Subgroup\_2*  
*norank\_o\_Subgroup\_21*  
*norank\_o\_Subgroup\_23*  
*norank\_o\_Subgroup\_25*  
*norank\_o\_Subgroup\_4*  
*norank\_o\_Subgroup\_6*  
*norank\_o\_Subgroup\_7*  
*norank\_o\_Sva0071*  
*norank\_o\_Sva0485*  
*norank\_o\_TRA3-20*  
*norank\_o\_UCT\_N117*  
*norank\_o\_Vampirovibrionales*  
*norank\_o\_aaa34a10*  
*norank\_o\_possible\_order\_07*  
*norank\_o\_vadinBA26*  
*norank\_o\_vadinHA64*  
*norank\_p\_Armatimonadetes*  
*norank\_p\_BD1-5*  
*norank\_p\_Candidate\_division\_B*  
*RC1*  
*norank\_p\_Candidate\_division\_JS*  
*I*  
*norank\_p\_Candidate\_division\_K*  
*B1*  
*norank\_p\_Candidate\_division\_O*  
*D1*  
*norank\_p\_Candidate\_division\_O*  
*P11*  
*norank\_p\_Candidate\_division\_O*  
*P3*  
*norank\_p\_Candidate\_division\_O*  
*P8*  
*norank\_p\_Candidate\_division\_SR*

1

*norank\_p\_\_Candidate\_division\_T  
M7*

*norank\_p\_\_Candidate\_division\_W  
S3*

*norank\_p\_\_Candidate\_division\_W  
S6*

*norank\_p\_\_JL-ETNP-Z39*

*norank\_p\_\_NPL-UPA2*

*norank\_p\_\_S2R-29*

*norank\_p\_\_SBYG-2791*

*norank\_p\_\_SHA-109*

*norank\_p\_\_SM2F11*

*norank\_p\_\_TA06*

*norank\_p\_\_TM6*

*norank\_p\_\_WCHB1-60*

*possible\_genus\_03*

*possible\_genus\_04*

*possible\_genus\_Sk003-Sk004*

*probable\_genus\_10*

*uncultured\_c\_\_Ardenticatenia*

*uncultured\_c\_\_Cyanobacteria*

*uncultured\_f\_\_Acidaminococcaceae*

*e*

*uncultured\_f\_\_Acidimicrobiaceae*

*uncultured\_f\_\_Acidobacteriaceae\_(Subgroup\_1)*

*uncultured\_f\_\_Alcaligenaceae*

*uncultured\_f\_\_Alteromonadaceae*

*uncultured\_f\_\_Anaerolineaceae*

*uncultured\_f\_\_Bacillaceae*

*uncultured\_f\_\_Bacteriovoracaceae*

*uncultured\_f\_\_Beijerinckiaceae*

*uncultured\_f\_\_Bradyrhizobiaceae*

*uncultured\_f\_\_Caldilineaceae*

*uncultured\_f\_\_Cardiobacteriaceae*

*uncultured\_f\_\_Carnobacteriaceae*

*uncultured\_f\_\_Caulobacteraceae*

*uncultured\_f\_\_Chitinophagaceae*

*uncultured\_f\_\_Christensenellaceae*

*uncultured\_f\_\_Chromatiaceae*

*uncultured\_f\_\_Clostridiaceae\_1*

*uncultured\_f\_\_Clostridiaceae\_4*

*uncultured\_f\_\_Comamonadaceae*

*uncultured\_f\_\_Coriobacteriaceae*

*uncultured\_f\_Corynebacteriaceae*  
*uncultured\_f\_Coxiellaceae*  
*uncultured\_f\_Cryomorphaceae*  
*uncultured\_f\_Cyclobacteriaceae*  
*uncultured\_f\_Cytophagaceae*  
*uncultured\_f\_Defluviitaleaceae*  
*uncultured\_f\_Dermatophilaceae*  
*uncultured\_f\_Desulfarculaceae*  
*uncultured\_f\_Desulfobacteraceae*  
*uncultured\_f\_Desulfobulbaceae*  
*uncultured\_f\_Desulfohalobiaceae*  
*uncultured\_f\_Desulfovibrionacea*  
*e*  
*uncultured\_f\_Desulfurellaceae*  
*uncultured\_f\_Enterobacteriaceae*  
*uncultured\_f\_Erysipelotrichaceae*  
*uncultured\_f>Erythrobacteraceae*  
*uncultured\_f\_Eubacteriaceae*  
*uncultured\_f\_FamilyI*  
*uncultured\_f\_Family\_XI*  
*uncultured\_f\_Family\_XII*  
*uncultured\_f\_Family\_XIII*  
*uncultured\_f\_Family\_XVII*  
*uncultured\_f\_Family\_XVIII*  
*uncultured\_f\_Fibrobacteraceae*  
*uncultured\_f\_Flammeovirgaceae*  
*uncultured\_f\_Flavobacteriaceae*  
*uncultured\_f\_Gallionellaceae*  
*uncultured\_f\_Gemmatimonadace*  
*ae*  
*uncultured\_f\_Halothiobacillaceae*  
*uncultured\_f\_Helicobacteraceae*  
*uncultured\_f\_Heliobacteriaceae*  
*uncultured\_f\_Holosporaceae*  
*uncultured\_f\_Hydrogenophilacea*  
*e*  
*uncultured\_f\_Hyphomicrobiaceae*  
*uncultured\_f\_Hyphomonadaceae*  
*uncultured\_f\_Ktedonobacteracea*  
*e*  
*uncultured\_f\_Lachnospiraceae*  
*uncultured\_f\_Leptospiraceae*  
*uncultured\_f\_Leptotrichiaceae*  
*uncultured\_f\_Marinilabiaceae*

*uncultured\_f\_\_Methylophilaceae*  
*uncultured\_f\_\_Mycoplasmataceae*  
*uncultured\_f\_\_Neisseriaceae*  
*uncultured\_f\_\_Nitrosomonadaceae*  
*uncultured\_f\_\_Nitrospinaceae*  
*uncultured\_f\_\_Oxalobacteraceae*  
*uncultured\_f\_\_Paenibacillaceae*  
*uncultured\_f\_\_Pasteurellaceae*  
*uncultured\_f\_\_Peptococcaceae*  
*uncultured\_f\_\_Peptostreptococcaeae*  
*uncultured\_f\_\_Phyllobacteriaceae*  
*uncultured\_f\_\_Piscirickettsiaceae*  
*uncultured\_f\_\_Planctomycetaceae*  
*uncultured\_f\_\_Planococcaceae*  
*uncultured\_f\_\_Porphyromonadaceae*  
*uncultured\_f\_\_Prevotellaceae*  
*uncultured\_f\_\_Rhodobacteraceae*  
*uncultured\_f\_\_Rhodocyclaceae*  
*uncultured\_f\_\_Rhodospirillaceae*  
*uncultured\_f\_\_Rhodothermaceae*  
*uncultured\_f\_\_Rikenellaceae*  
*uncultured\_f\_\_Ruminococcaceae*  
*uncultured\_f\_\_Saprospiraceae*  
*uncultured\_f\_\_Solimonadaceae*  
*uncultured\_f\_\_Sphingobacteriaceae*  
*e*  
*uncultured\_f\_\_Spirochaetaceae*  
*uncultured\_f\_\_Succinivibrionaceae*  
*uncultured\_f\_\_Synergistaceae*  
*uncultured\_f\_\_Syntrophaceae*  
*uncultured\_f\_\_Syntrophobacteraceae*  
*ae*  
*uncultured\_f\_\_Syntrophomonadaceae*  
*uncultured\_f\_\_Thermoanaerobacteraceae*  
*uncultured\_f\_\_Thiotrichaceae*  
*uncultured\_f\_\_Veillonellaceae*  
*uncultured\_f\_\_Verrucomicrobiaceae*  
*ae*  
*uncultured\_f\_\_Xanthobacteraceae*  
*uncultured\_f\_\_Xanthomonadaceae*



*uncultured\_f\_Xanthomonadales\_Incertae\_Sedis*  
*uncultured\_o\_Acidimicrobiales*  
*uncultured\_o\_Bacteroidales*  
*uncultured\_o\_Clostridiales*  
*uncultured\_o\_Corynebacteriales*  
*uncultured\_o\_Frankiales*  
*uncultured\_o\_Gaiellales*  
*uncultured\_o\_Myxococcales*  
*uncultured\_o\_Order\_III*  
*uncultured\_o\_Selenomonadales*  
*uncultured\_o\_SubsectionII*  
*uncultured\_o\_Xanthomonadales*  
*uncultured\_p\_Chloroflexi*  
*vadinBC27\_wastewater-sludge\_gr*  
*oup*

---

**Table S4A.** Antibiotic resistant genes identified in gut microbiota from the Han samples

| Sample ID \ Gene type | 0     | 1    | 2   | 3   | 4    | 5   | 6   | 7   | 9    | 11   | 12   | 13  |
|-----------------------|-------|------|-----|-----|------|-----|-----|-----|------|------|------|-----|
| <b>aac6ib</b>         | 1470  | 0    | 0   | 0   | 0    | 0   | 0   | 0   | 0    | 0    | 0    | 0   |
| <b>aac6ie</b>         | 0     | 2    | 14  | 22  | 142  | 0   | 0   | 2   | 0    | 0    | 112  | 4   |
| <b>acra</b>           | 7322  | 0    | 22  | 2   | 2    | 12  | 4   | 0   | 36   | 30   | 0    | 2   |
| <b>acrb</b>           | 45758 | 6    | 72  | 2   | 16   | 86  | 2   | 6   | 118  | 130  | 4    | 6   |
| <b>ant3ia</b>         | 0     | 0    | 0   | 114 | 0    | 2   | 4   | 0   | 0    | 0    | 0    | 122 |
| <b>ant6ia</b>         | 0     | 66   | 70  | 28  | 72   | 42  | 10  | 96  | 68   | 30   | 48   | 154 |
| <b>aph33ib</b>        | 12    | 0    | 152 | 8   | 450  | 4   | 4   | 0   | 2    | 0    | 88   | 62  |
| <b>aph3ia</b>         | 0     | 0    | 76  | 0   | 0    | 0   | 0   | 0   | 0    | 0    | 2    | 0   |
| <b>aph3iia</b>        | 6     | 12   | 16  | 10  | 16   | 90  | 80  | 4   | 0    | 4    | 4    | 38  |
| <b>aph6id</b>         | 24    | 0    | 230 | 4   | 554  | 6   | 8   | 0   | 0    | 0    | 106  | 90  |
| <b>arna</b>           | 14630 | 0    | 26  | 0   | 4    | 18  | 0   | 0   | 28   | 34   | 0    | 0   |
| <b>aca</b>            | 7640  | 7046 | 772 | 692 | 7376 | 657 | 578 | 719 | 8312 | 6758 | 4458 | 815 |
| <b>bcr</b>            |       |      | 8   | 4   |      | 4   | 2   | 2   |      |      |      | 2   |
| <b>bcr</b>            | 8806  | 0    | 10  | 2   | 0    | 6   | 0   | 0   | 14   | 6    | 0    | 4   |
| <b>bl1_ec</b>         | 10204 | 0    | 16  | 0   | 2    | 2   | 0   | 0   | 24   | 32   | 0    | 2   |
| <b>bl2d_oxa1</b>      | 5898  | 0    | 0   | 0   | 0    | 0   | 0   | 0   | 2    | 0    | 0    | 0   |
| <b>bl2e_cbla</b>      | 0     | 12   | 188 | 74  | 118  | 80  | 4   | 138 | 34   | 18   | 144  | 22  |
| <b>bl2e_cepa</b>      | 0     | 46   | 152 | 12  | 158  | 268 | 42  | 36  | 176  | 88   | 152  | 90  |
| <b>bl2e_cfxa</b>      | 0     | 1152 | 704 | 6   | 2854 | 396 | 706 | 143 | 0    | 0    | 284  | 104 |
| <b>bl3_ccra</b>       |       |      |     |     |      |     |     | 8   |      |      |      | 6   |
| <b>bl3_ccra</b>       | 78    | 0    | 0   | 0   | 0    | 122 | 138 | 0   | 0    | 0    | 34   | 0   |
| <b>emrd</b>           | 5400  | 4    | 8   | 0   | 4    | 6   | 0   | 0   | 12   | 10   | 0    | 2   |
| <b>ermf</b>           | 1596  | 0    | 0   | 0   | 2    | 0   | 0   | 0   | 8    | 14   | 0    | 0   |
| <b>ermb</b>           | 8     | 1168 | 716 | 248 | 476  | 732 | 374 | 116 | 172  | 182  | 832  | 966 |
| <b>ermf</b>           | 4     | 162  | 127 | 305 | 2076 | 144 | 948 | 281 | 1154 | 956  | 1718 | 136 |

|              |       |      |     |     |      |     |     |     |      |      |     |     |
|--------------|-------|------|-----|-----|------|-----|-----|-----|------|------|-----|-----|
|              |       |      | 6   | 4   |      | 4   |     | 2   |      |      |     | 0   |
| <b>ermg</b>  | 0     | 5016 | 2   | 2   | 0    | 2   | 0   | 0   | 0    | 0    | 14  | 0   |
| <b>ermx</b>  | 2     | 22   | 142 | 92  | 36   | 52  | 42  | 52  | 58   | 16   | 22  | 112 |
| <b>ksga</b>  | 7204  | 4    | 26  | 0   | 4    | 16  | 0   | 0   | 26   | 34   | 0   | 0   |
| <b>macb</b>  | 14492 | 0    | 16  | 0   | 6    | 32  | 0   | 0   | 20   | 46   | 0   | 8   |
| <b>mdfa</b>  | 7624  | 2    | 2   | 0   | 0    | 6   | 4   | 0   | 18   | 28   | 0   | 0   |
| <b>mdte</b>  | 9140  | 0    | 16  | 0   | 4    | 18  | 0   | 4   | 14   | 32   | 4   | 0   |
| <b>mdtf</b>  | 24656 | 4    | 42  | 0   | 16   | 44  | 2   | 0   | 68   | 50   | 0   | 0   |
| <b>mdtg</b>  | 8162  | 0    | 8   | 0   | 2    | 8   | 4   | 0   | 20   | 26   | 0   | 2   |
| <b>mdth</b>  | 7612  | 0    | 14  | 0   | 4    | 20  | 0   | 2   | 18   | 18   | 0   | 0   |
| <b>mdtk</b>  | 8702  | 0    | 16  | 0   | 2    | 4   | 2   | 2   | 8    | 28   | 0   | 0   |
| <b>mdtl</b>  | 8246  | 2    | 10  | 2   | 0    | 12  | 6   | 2   | 12   | 8    | 0   | 0   |
| <b>mdtm</b>  | 12672 | 0    | 22  | 0   | 0    | 16  | 0   | 2   | 16   | 16   | 0   | 2   |
| <b>mdtn</b>  | 7526  | 0    | 6   | 0   | 6    | 18  | 0   | 0   | 4    | 16   | 0   | 0   |
| <b>mdto</b>  | 13838 | 0    | 28  | 0   | 4    | 22  | 6   | 0   | 28   | 54   | 0   | 0   |
| <b>mdtp</b>  | 13010 | 6    | 24  | 2   | 6    | 6   | 0   | 0   | 26   | 34   | 0   | 4   |
| <b>mefa</b>  | 0     | 4    | 0   | 0   | 238  | 4   | 0   | 0   | 0    | 2    | 8   | 0   |
| <b>rosa</b>  | 1486  | 0    | 6   | 0   | 0    | 0   | 0   | 0   | 2    | 4    | 0   | 0   |
| <b>rosb</b>  | 6896  | 0    | 20  | 0   | 2    | 10  | 0   | 0   | 10   | 16   | 2   | 0   |
| <b>sul1</b>  | 11848 | 0    | 2   | 180 | 0    | 12  | 0   | 0   | 6    | 4    | 0   | 138 |
| <b>sul2</b>  | 18    | 0    | 424 | 0   | 176  | 2   | 0   | 294 | 0    | 0    | 144 | 124 |
| <b>tet32</b> | 2     | 196  | 418 | 8   | 362  | 250 | 114 | 18  | 464  | 388  | 336 | 542 |
| <b>tet37</b> | 0     | 6914 | 4   | 0   | 2    | 0   | 2   | 2   | 0    | 0    | 0   | 0   |
| <b>tet40</b> | 64    | 454  | 147 | 360 | 1666 | 570 | 135 | 187 | 1154 | 1194 | 906 | 538 |
|              |       |      | 2   |     |      |     | 2   | 2   |      |      |     | 0   |
| <b>teta</b>  | 68    | 2    | 16  | 2   | 618  | 12  | 0   | 2   | 12   | 38   | 122 | 2   |
| <b>tetb</b>  | 62    | 0    | 0   | 4   | 0    | 0   | 0   | 0   | 0    | 0    | 0   | 0   |
| <b>tetc</b>  | 5432  | 0    | 0   | 300 | 0    | 2   | 4   | 0   | 0    | 0    | 0   | 178 |
| <b>tetm</b>  | 4     | 2    | 10  | 0   | 0    | 212 | 50  | 0   | 0    | 0    | 18  | 2   |



**Table S4B.** Antibiotic resistant genes identified in gut microbiota from the Tibetan samples

| Sample ID \ Gene type | 3_1 | 3_2 | 3_3 | 3_4 | 3_5 | 3_6 | 3_7 | 3_8 | 3_9 | 3_1 | 3_1 | 3_1 | 3_1 | 3_1 | 3_1 |
|-----------------------|-----|-----|-----|-----|-----|-----|-----|-----|-----|-----|-----|-----|-----|-----|-----|
|                       |     |     |     |     |     |     |     |     |     | 0   | 1   | 2   | 3   | 4   | 5   |
| <b>aac6ie</b>         | 50  | 136 | 372 | 500 | 142 | 378 | 144 | 828 | 582 | 246 | 330 | 28  | 397 | 8   | 336 |
|                       |     |     |     |     |     |     | 2   |     |     |     | 2   |     | 8   |     |     |
| <b>acrb</b>           | 46  | 0   | 4   | 82  | 4   | 12  | 0   | 492 | 12  | 0   | 378 | 2   | 58  | 244 | 230 |
|                       |     |     |     |     |     |     |     | 6   |     |     |     |     |     | 8   |     |
| <b>ant6ia</b>         | 294 | 200 | 510 | 484 | 208 | 324 | 458 | 182 | 40  | 300 | 546 | 320 | 118 | 6   | 254 |
|                       |     |     |     |     |     |     |     |     |     |     |     |     | 0   |     |     |
| <b>aph33ib</b>        | 10  | 0   | 52  | 16  | 12  | 34  | 36  | 2   | 0   | 0   | 74  | 8   | 2   | 822 | 16  |
| <b>aph33iia</b>       | 0   | 0   | 0   | 0   | 4   | 2   | 0   | 14  | 0   | 0   | 4   | 0   | 42  | 0   | 0   |
| <b>aca</b>            | 326 | 271 | 350 | 457 | 383 | 330 | 204 | 272 | 213 | 364 | 435 | 260 | 464 | 200 | 395 |
|                       | 8   | 6   | 6   | 4   | 2   | 6   | 2   | 0   | 4   | 0   | 0   | 0   | 6   | 8   | 8   |
| <b>bcr</b>            | 0   | 0   | 0   | 12  | 0   | 2   | 0   | 756 | 0   | 0   | 40  | 0   | 4   | 98  | 26  |
| <b>bl2be_ctxm</b>     | 0   | 0   | 0   | 0   | 0   | 0   | 0   | 0   | 0   | 0   | 2   | 0   | 0   | 0   | 46  |
| <b>bl2e_cepa</b>      | 4   | 2   | 0   | 4   | 26  | 6   | 0   | 0   | 0   | 16  | 66  | 0   | 8   | 0   | 2   |
| <b>bl2e_cfxa</b>      | 487 | 105 | 131 | 110 | 555 | 949 | 246 | 901 | 259 | 636 | 412 | 915 | 460 | 562 | 155 |
|                       | 4   | 78  | 50  |     | 2   | 8   | 28  | 2   | 38  | 2   | 0   | 4   | 2   |     | 82  |
| <b>bl3_ccra</b>       | 0   | 0   | 0   | 2   | 0   | 0   | 0   | 0   | 0   | 0   | 6   | 4   | 12  | 0   | 16  |
| <b>cata11</b>         | 2   | 0   | 0   | 0   | 0   | 18  | 0   | 4   | 0   | 0   | 14  | 0   | 0   | 0   | 16  |
| <b>dfra17</b>         | 10  | 0   | 0   | 0   | 0   | 0   | 0   | 0   | 0   | 0   | 44  | 0   | 0   | 0   | 6   |
| <b>emrd</b>           | 18  | 0   | 2   | 12  | 0   | 0   | 0   | 330 | 0   | 0   | 52  | 0   | 22  | 670 | 62  |
| <b>emre</b>           | 2   | 0   | 0   | 10  | 0   | 0   | 0   | 0   | 0   | 0   | 24  | 0   | 6   | 4   | 6   |
| <b>erma</b>           | 0   | 0   | 0   | 0   | 0   | 0   | 0   | 0   | 0   | 0   | 26  | 0   | 2   | 0   | 0   |
| <b>ermg</b>           | 0   | 0   | 36  | 0   | 0   | 2   | 0   | 0   | 0   | 156 | 0   | 4   | 18  | 0   | 16  |
|                       |     |     |     |     |     |     |     |     |     | 8   |     |     |     |     |     |
| <b>macb</b>           | 16  | 0   | 0   | 14  | 2   | 8   | 0   | 123 | 2   | 0   | 60  | 0   | 26  | 606 | 56  |
|                       |     |     |     |     |     |     |     | 4   |     |     |     |     |     |     |     |
| <b>mdfa</b>           | 6   | 0   | 0   | 10  | 0   | 10  | 0   | 714 | 0   | 0   | 62  | 2   | 28  | 168 | 46  |

|              |     |     |     |     |     |     |     |     |     |     |     |     |     |     |     |
|--------------|-----|-----|-----|-----|-----|-----|-----|-----|-----|-----|-----|-----|-----|-----|-----|
| <b>mdtf</b>  | 18  | 0   | 0   | 32  | 4   | 6   | 0   | 260 | 8   | 0   | 134 | 0   | 22  | 104 | 118 |
|              |     |     |     |     |     |     |     | 0   |     |     |     |     |     | 8   |     |
| <b>mdtg</b>  | 10  | 0   | 0   | 12  | 2   | 2   | 0   | 872 | 0   | 0   | 68  | 0   | 18  | 480 | 48  |
| <b>mdth</b>  | 8   | 0   | 0   | 2   | 0   | 4   | 0   | 694 | 0   | 2   | 60  | 0   | 12  | 334 | 50  |
| <b>mdtk</b>  | 4   | 0   | 0   | 4   | 0   | 4   | 2   | 764 | 0   | 0   | 34  | 0   | 6   | 244 | 42  |
| <b>mdtl</b>  | 6   | 0   | 0   | 6   | 0   | 2   | 0   | 0   | 0   | 0   | 18  | 0   | 8   | 224 | 6   |
| <b>mdtm</b>  | 14  | 2   | 0   | 12  | 2   | 10  | 2   | 134 | 0   | 0   | 70  | 0   | 24  | 230 | 46  |
|              |     |     |     |     |     |     |     | 0   |     |     |     |     |     |     |     |
| <b>mdto</b>  | 8   | 0   | 0   | 6   | 2   | 6   | 0   | 157 | 0   | 2   | 78  | 0   | 18  | 528 | 46  |
|              |     |     |     |     |     |     |     | 6   |     |     |     |     |     |     |     |
| <b>mefa</b>  | 0   | 0   | 0   | 26  | 0   | 0   | 0   | 0   | 0   | 38  | 0   | 6   | 0   | 0   | 0   |
| <b>mexy</b>  | 0   | 0   | 2   | 12  | 0   | 0   | 0   | 0   | 0   | 14  | 0   | 2   | 0   | 0   | 0   |
| <b>rosb</b>  | 16  | 0   | 0   | 12  | 0   | 2   | 0   | 108 | 4   | 0   | 70  | 0   | 16  | 718 | 46  |
|              |     |     |     |     |     |     |     | 2   |     |     |     |     |     |     |     |
| <b>sul2</b>  | 14  | 2   | 68  | 40  | 8   | 78  | 124 | 226 | 2   | 0   | 178 | 12  | 20  | 26  | 34  |
| <b>tet</b>   | 0   | 0   | 2   | 0   | 0   | 0   | 0   | 0   | 0   | 0   | 0   | 0   | 0   | 0   | 2   |
| <b>tet32</b> | 490 | 380 | 418 | 107 | 762 | 596 | 454 | 108 | 278 | 384 | 410 | 810 | 116 | 40  | 106 |
|              |     |     |     | 8   |     |     |     |     |     |     |     |     | 4   | 4   |     |
| <b>tet37</b> | 238 | 150 | 310 | 188 | 544 | 300 | 135 | 94  | 351 | 426 | 0   | 362 | 120 | 228 | 562 |
|              |     |     |     |     |     |     | 4   |     | 6   |     |     |     |     | 6   |     |
| <b>tet40</b> | 259 | 127 | 196 | 243 | 249 | 133 | 104 | 508 | 830 | 106 | 840 | 952 | 232 | 192 | 294 |
|              | 4   | 4   | 4   | 0   | 6   | 6   | 4   |     |     | 8   |     |     | 4   | 6   | 4   |
| <b>tetb</b>  | 0   | 0   | 0   | 0   | 0   | 0   | 0   | 0   | 0   | 0   | 0   | 0   | 0   | 10  | 0   |
| <b>tetc</b>  | 26  | 0   | 0   | 2   | 0   | 0   | 0   | 0   | 0   | 0   | 84  | 6   | 0   | 0   | 2   |
| <b>tetm</b>  | 424 | 92  | 262 | 138 | 518 | 130 | 146 | 108 | 34  | 142 | 924 | 212 | 610 | 0   | 308 |
| <b>teto</b>  | 179 | 770 | 154 | 862 | 107 | 114 | 538 | 484 | 626 | 142 | 119 | 612 | 208 | 38  | 295 |
|              | 4   |     | 4   |     | 6   | 2   |     |     |     | 6   | 4   |     | 4   |     | 2   |
| <b>tetpa</b> | 2   | 14  | 2   | 8   | 0   | 28  | 8   | 6   | 16  | 0   | 0   | 4   | 2   | 0   | 12  |
| <b>tetpb</b> | 18  | 10  | 14  | 4   | 0   | 128 | 6   | 8   | 56  | 2   | 4   | 8   | 10  | 0   | 14  |

|               |     |     |     |     |     |     |     |     |     |     |     |     |     |     |     |
|---------------|-----|-----|-----|-----|-----|-----|-----|-----|-----|-----|-----|-----|-----|-----|-----|
| <b>tetq</b>   | 639 | 745 | 675 | 648 | 866 | 656 | 166 | 601 | 504 | 201 | 929 | 130 | 641 | 606 | 111 |
|               | 6   | 8   | 4   | 4   | 4   | 4   | 26  | 4   | 30  | 4   | 2   | 00  | 8   |     | 94  |
| <b>tetw</b>   | 296 | 187 | 309 | 537 | 268 | 162 | 175 | 236 | 942 | 174 | 301 | 237 | 502 | 115 | 347 |
|               | 4   | 4   | 4   | 6   | 2   | 8   | 0   |     |     | 2   | 0   | 8   | 2   | 6   | 8   |
| <b>vang</b>   | 12  | 4   | 16  | 492 | 0   | 10  | 6   | 0   | 10  | 28  | 0   | 134 | 10  | 0   | 20  |
| <b>vanra</b>  | 0   | 0   | 12  | 16  | 6   | 0   | 0   | 0   | 0   | 0   | 0   | 0   | 0   | 0   | 0   |
| <b>vanrd</b>  | 22  | 0   | 8   | 8   | 6   | 0   | 26  | 0   | 0   | 6   | 8   | 0   | 12  | 2   | 2   |
| <b>vanrg</b>  | 28  | 18  | 44  | 252 | 22  | 14  | 70  | 134 | 46  | 112 | 16  | 42  | 20  | 4   | 48  |
| <b>vantg</b>  | 2   | 18  | 44  | 88  | 8   | 14  | 6   | 0   | 18  | 46  | 0   | 182 | 26  | 0   | 40  |
|               |     |     |     | 6   |     |     |     |     |     |     |     |     |     |     |     |
| <b>vanug</b>  | 62  | 16  | 104 | 23  | 78  | 56  | 48  | 30  | 2   | 15  | 13  | 52  | 26  | 6   | 112 |
|               |     |     |     | 8   |     |     |     |     |     | 6   | 0   |     |     |     |     |
| <b>vanxyg</b> | 2   | 0   | 2   | 13  | 2   | 0   | 0   | 0   | 2   | 2   | 0   | 14  | 2   | 0   | 8   |
|               |     |     |     | 8   |     |     |     |     |     |     |     |     |     |     |     |
| <b>vatb</b>   | 4   | 0   | 0   | 18  | 0   | 0   | 0   | 0   | 0   | 0   | 0   | 14  | 0   | 0   | 0   |

---

**Figure S1**

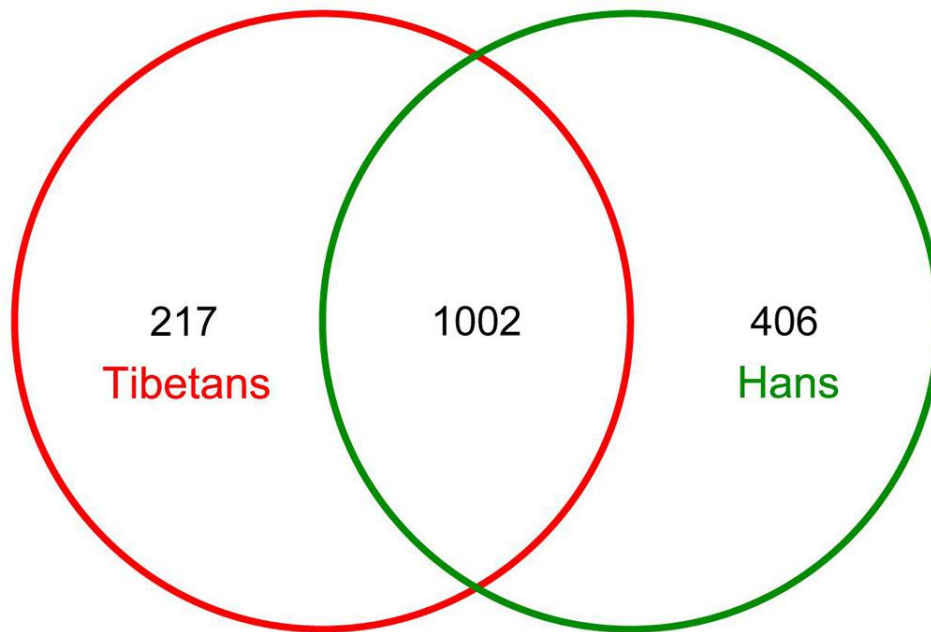



Figure S2

**A**

Sequence length distribution

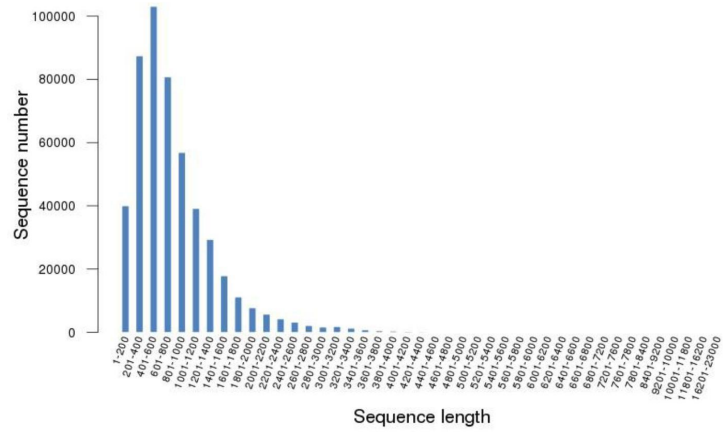

**B**

Sequence length distribution

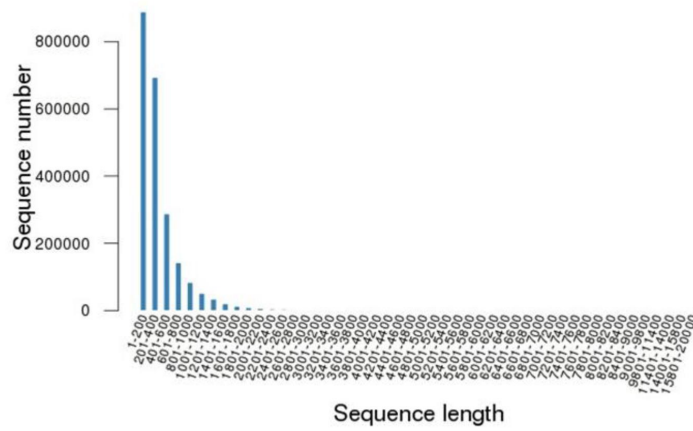

**Figure S3**

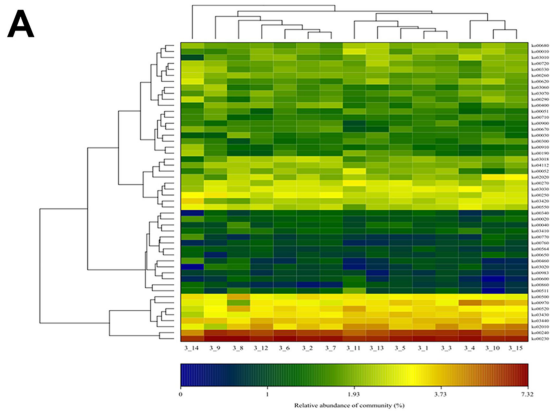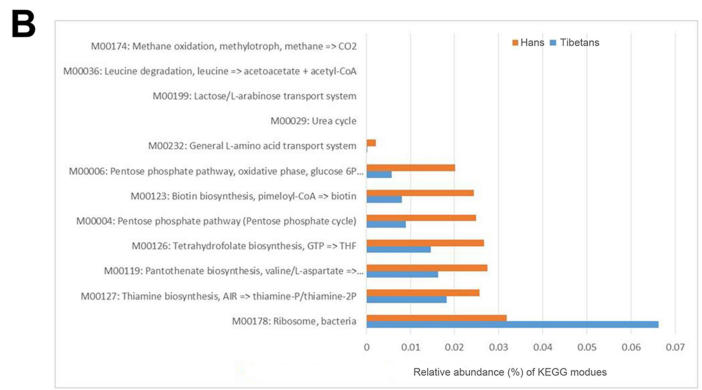

Supplement: f1 [file 1482109.f1.pdf]
